# Supplementary material for: Identification and Functional Analysis of MicroRNAs and Their Targets in Platanus acerifolia under Lead (Pb) Stress
Source: MDPI journal article supplement (doi:10.3390/ijms16047098), 2015-03-30
Supplement: s1 [file s1]

# Supplementary Information

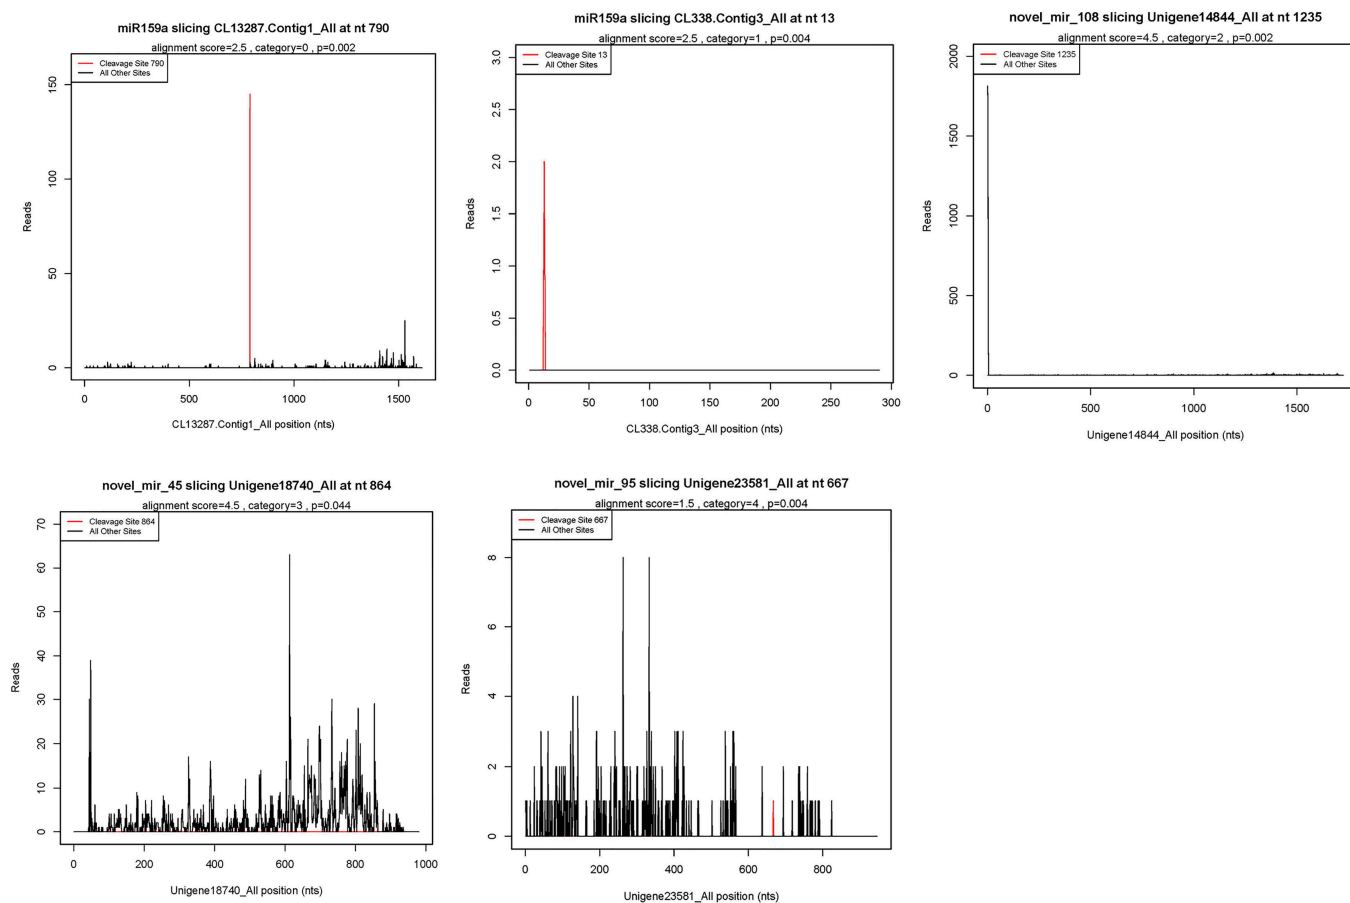

**Figure S1.** Target plots (*t*-plots) of miRNA targets in different categories confirmed by degradome sequencing.

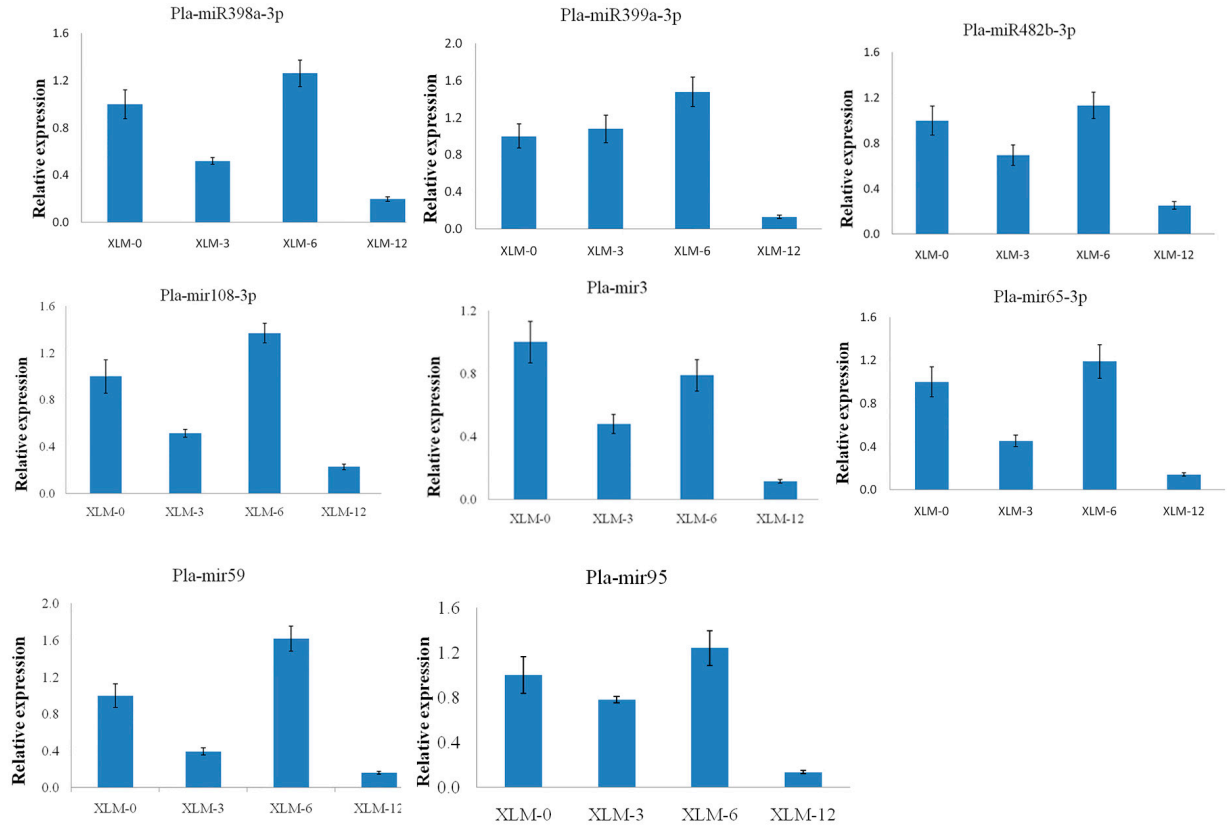

**Figure S2.** Relative expression levels of the miRNAs in *P. acerifolia*.

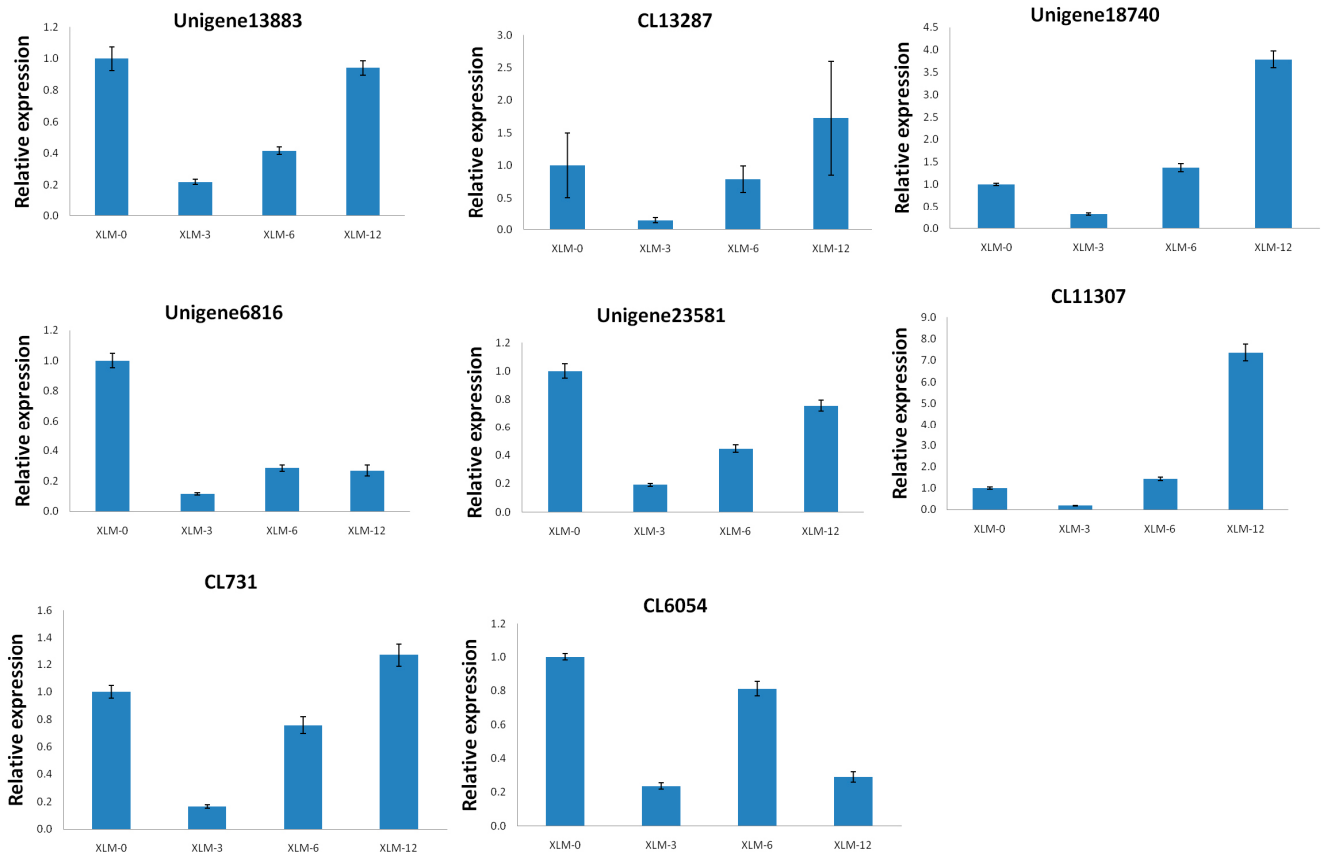

**Figure S3.** Relative expression levels of the target genes in *P. acerifolia*.
