# Supplementary material for: Identification and Functional Analysis of MicroRNAs and Their Targets in Platanus acerifolia under Lead (Pb) Stress
Source: Int J Mol Sci. 2015 Mar 30;16(4):7098–111. doi: 10.3390/ijms16047098 (PMC4425006; doi:10.3390/ijms16047098)
Supplement: Supplementary file 1 [file ijms-16-07098-s001.zip › ijms-79800-Supplementary Information-Tables.xlsx]

## Sheet: Table S1
Table S1. The sequences of conserved miRNAs identified from P. acerifolia.
miRNA	Seq（5P/3P）	Length	MFE	Expression		miRNA* sequences	sequences	struct	location	std		fold-change(log2 XLM-12-40/XLM-0)	p-value
				XLM-0	XLM-12-40					XLM-0	XLM-12-40
Pla-miR156a	TGACAGAAGAGAGAGAGCAC	20	-59.8	1384	1135	-	TGATGACAGAAGAGAGAGAGCACAGTCCGATTCAGGGACTCGAGTTAACTCATTGGCGAACATTTTCTGGCCACCCTCACTTTCTAGTGAGGCAATGGTATTGAGAAGTGGTTGGCAGACAGAAGCGCCAGGGGCCGTTTGATTGATGAATGTGGGACCATTATTTTGCATGAAAGGGAATTGCTTTCCTCCTTTGTAATTG	.(((.(((((.(((.(((((((.(((((.......)))))........(((.((((((.....((((((((((((((((((....)))))))((((...))))....)))))))).)))......)))))))))((.(((.((.(..(((((((....)).)))))..))).))).))...)))))))))).))))).))).	CL16407.Contig1_All:1:202:+	98.9007	82.1365	-0.267957	3.35537e-06
Pla-miR156b	TGACAGAAGAGAGAGAGCAC	20	-89.1	1384	1135	-	TTGCCGGTGATGACAGAAGAGAGAGAGCACAATCAGAGTCAAGGACTCGAGTTAACCCATCGGAGAACATTTTCCTGCTGCCTTCACCTTCGGATGAGGCAATGGTATTGAGAAGCGGCTCACAGACAGAAGATTCCGGGGTTGTTCGATTGATGAGTGTGGGATCATTACTTTGCATAAAAGGGAACTGCTTCCCTCCTTTGTAGTTGAGAGAGAAGGATCCAGTAAATGGATTTTGCCTGTCAACAAAGTGTGGTTGTTGGTGGCGGTTATAAAGCATTGCATCTTCCTCAGTTTTGACAACCCCGGCCC	..(((((.(.((.((((((((.(((((((...((.(((((...)))))))(((..((....))..))).(((((.(((((((((..((...))..)))))...))))..)))))((.(((.(((..((.(.(((((((.(.(((((.....))))).).))))))).......((((....((((((....))))))....))))(((((.((.(.((((((((.....)))))))).))).)))))....).))..))).))).)).(((....)))..))).)))).)))..))))).)).).)))))..	CL16407.Contig2_All:382:693:-	98.9007	82.1365	-0.267957	3.35537e-06
Pla-miR157a	TGACAGAAGAGAGAGAGCAT	20	-23.4	2484342	1300938	-	TGTGCTGTTATATTTTGTGTCTGATTTAGATAAAAATCTTCAATACATTCATATGAAAAACACCACCATGAGTGCATGAAGTAAGCCATGGGATGACAGAAGAGAGAGAGCATGCTTGAGAGC	.(((((.((...((((.((((..((((..........(((((...(((((((.((........))..)))))))..))))).........)))))))).))))..)).)))))(((....)))	Unigene45989_All:1:123:+	177531	94144.9	-0.915117	0
Pla-miR157b	TTGACAGAAGATAGAGAGCAC	21	-58.2	2484342	1300938	GCTCTCTATGCTTCTGTCATC	AGGAGGCACTGGTGATGCTGTTGACAGAAGATAGAGAGCACAGATGATGAAATGCAAGGAGTCTAGCATCTCACTCCTTTGTGCTCTCTATGCTTCTGTCATCACCTTCCGCTCCTCACCCTA	(((((.....(((((......(((((((((((((((((((((((.(((((.((((.((....)).)))).))).)).)))))))))))))).)))))))))))))).....))))).......	CL2116.Contig1_All:63:185:+	177531	94144.9	-0.915117	0
Pla-miR157c	TTGACAGAAGATAGAGAGCAC	21	-58.2	2484342	1300938	GCTCTCTATGCTTCTGTCATC	AGGAGGCACTGGTGATGCTGTTGACAGAAGATAGAGAGCACAGATGATGAAATGCAAGGAGTCTAGCATCTCACTCCTTTGTGCTCTCTATGCTTCTGTCATCACCTTCCGCTCCTCACCCTA	(((((.....(((((......(((((((((((((((((((((((.(((((.((((.((....)).)))).))).)).)))))))))))))).)))))))))))))).....))))).......	CL2116.Contig2_All:63:185:+	177531	94144.9	-0.915117	0
Pla-miR157d	TTGACAGAAGATAGAGAGCAC	21	-54.8	2484342	1300938	GCTCTCTATGCTTCTGTCATC	AGGAGGCACTGGTGATGCTGTTGACAGAAGATAGAGAGCACAGATGATGAAATGCAAGGAGTCTAGCATCTCACTCCTTTGTGCTCTCTATGCTTCTGTCATCACCTCTAATCCCTCACCCCA	..((((....(((((......(((((((((((((((((((((((.(((((.((((.((....)).)))).))).)).)))))))))))))).)))))))))))))).......))))......	Unigene15931_All:18:140:+	177531	94144.9	-0.915117	0
Pla-miR157e	TTGACAGAAGATAGAGAGCAC	21	-58.2	2484742	1300942	GCTCTCTATGCTTCTGTCATC	AGGAGGCACTGGTGATGCTGTTGACAGAAGATAGAGAGCACAGATGATGAAATGCAAGGAGTCTAGCATCTCACTCCTTTGTGCTCTCTATGCTTCTGTCATCACCTTCAACTCCTCACCCCG	(((((.....(((((......(((((((((((((((((((((((.(((((.((((.((....)).)))).))).)).)))))))))))))).)))))))))))))).....))))).......	Unigene31414_All:63:185:+	177560	94145.2	-0.915344	0
Pla-miR529a	TTGACAGAAGATAGAGAGCAC	21	-47.5	6296	7317	CTCTCTTTTCTTCTGCCAACA	CGTTGGTGGTGGTGTTGTTGTTGACAGAAGATAGAGAGCACAACTGAACATCCGCATGGCTTGCGTTTGGCCAGTCTTGTGCTCTCTTTTCTTCTGCCAACACAAGGAGTATAAGAATCTTC	..............((((.((((.(((((((.((((((((((((((..((..((((.....))))..))..))))..))))))))))..))))))).))))))))((((.........))))	Unigene62226_All:27:148:+	449.912	529.509	0.235012	2.30989e-21
Pla-miR159a-3p	TTTGGATTGAAGGGAGCTCTA	21	-94.7	3932	7119	GAGCTCCTTGAAGTCCAATA	GGTATTAGGGTTTTGGGGTGGAGCTCCTTGAAGTCCAATAGAGGCTCTTGCTGGGTAGATTGAGCTGCTGAATTATGGATCCCACAGCTCTATCTAATGTTTGGAGGGTTTTGGATAGGATTGTGGCTTGCATATTTCAGGAGCTGCATTATCCATGTGAGATCCTTGTTTGGATTGAAGGGAGCTCTACACTCTTCTTATTTGCTTGT	((((.(((((....(((((((((((((((..(((((((..((((.(((((((((((((..((((((.(((((.((((.(..((((((.(((((((((.............))))))))).))))))..).)))).))))).)))).))))))))).)))))).))))..)))))))..)))))))))))).))).)))))..))))...	Unigene12661_All:933:1141:-	280.981	515.18	0.874606	1.45573e-213
Pla-miR159b-3p	TTTGGATTGAAGGGAGCTCTA	21	-87	3932	7119	GAGCTCCTTGAAGTCCAATA	TTTTGGGTGGAGCTCCTTGAAGTCCAATAGAGGTTCTTACAGGTTCGATTGAGCTGCTGAATTATGGATCCCACAAACCTATTTCATGTTTGGATGTTTCGGATAGGGTTGTGGTTTGCATATTTCAGGAGCTGCATTAGCCATGTTAGATCCTTGTTTGGATTGAAGGGAGCTCTACACTATCT	...(((((((((((((((..(((((((..((((.(((.(((((((.(((..((((.(((((.((((.(..(((((..((((((((((......)))....)))))))..)))))..).)))).))))).))))..))))))).))).))).))))..)))))))..)))))))))))).)))...	Unigene47784_All:114:298:-	280.981	515.18	0.874606	1.45573e-213
Pla-miR162-3p	TCGATAAACCTCTGCATCCGG	21	-43.8	788	665	-	CTTGTGATGTCTCCGGACGCAGCGGTTTATTGATCTCTTCCTGGACTGCTTGCCAATTGAAGTAAAAGACAAAGCAGGAATCGGTCGATAAACCTCTGCATCCGGTGCTCTCTCT	...(.((.((..(((((.((((.((((((((((((..((((((...(((((..............))).))...))))))..)))))))))))).)))).))))).)))).)...	Unigene57465_All:64:178:-	56.3105	48.124	-0.226646	0.00281642
Pla-miR167a	TGAAGCTGCCAGCATGATCTA	21	-48.6	140376	165396	GATCATATGGCAGCTTCACC	TGCCGTGCACTGCTAGCAGTTGAAGCTGCCAGCATGATCTAAACTCTCCTCTCAAGGGAGATCAGATCATATGGCAGCTTCACCCGTTGATGGTAGCACGAGAA	...(((((((((.((((.(.(((((((((((..(((((((....((((((.....))))))..))))))).))))))))))).).)))).)))).)))))....	CL12259.Contig1_All:26:129:+	10031.3	11969.2	0.254823	0
Pla-miR167b	TGAAGCTGCCAGCATGATCTA	21	-48.6	140376	165396	GATCATATGGCAGCTTCACC	TGCCGTGCACTGCTAGCAGTTGAAGCTGCCAGCATGATCTAAACTCTCCTCTCAAGGGAGATCAGATCATATGGCAGCTTCACCCGTTGATGGTAGCACGAGAA	...(((((((((.((((.(.(((((((((((..(((((((....((((((.....))))))..))))))).))))))))))).).)))).)))).)))))....	CL12259.Contig2_All:26:129:+	10031.3	11969.2	0.254823	0
Pla-miR168a	TCGCTTGGTGCAGGTCGGGCA	21	-46.2	7015	7022	-	GAATTCGCTTGGTGCAGGTCGGGCACTTGGATTTCGCATGGTTTCAATAACCTTGATTTGCGAATCAAATGCCGACTTGCACCATCCGAGTTCA	(((((((..(((((((((((((.((.((((..((((((.....((((.....))))..)))))))))).)))))))))))))))..))))))).	Unigene61269_All:143:236:-	501.292	508.161	0.019634	0.42011
Pla-miR168b	TCGCTTGGTGCAGGTCGGGAA	21	-57.2	45398	58819	CCCGCCTTGCATCAACTGAAT	CTGTTACTGTTGCCTCTAATTCGCTTGGTGCAGGTCGGGAATGATTCGCCTCCGTATTGTTTCTGTTTTGGTTTTTTCAATGTTTGATTGATTTTACGGGTGAATTGAATCCCGCCTTGCATCAACTGAATCGGAGACGGCGGTGAGGTTA	...(((((((((.((((.(((((.((((((((((.(((((.(((((((((..((((..(((((....((((.....)))).....))..)))..)))))))))))))..))))).)))))))))).))))).)))).))))))))).....	Unigene8529_All:39:189:+	3244.14	4256.55	0.391849	0
Pla-miR169a-3p	TGGCAAGTTGTCTTTGGCTAC	21	-53	1039	2211	CAGCCAAGGATGACTTGCCGA	TAGGCTCAGTAAGTTTGGTGCAGCCAAGGATGACTTGCCGACTCTTTACAGCTTTTGCATTTCATCCTCGACGGGATTCGCAGAAGGAAAGTTGGCAAGTTGTCTTTGGCTACATGTTTCTTTCTGCTTCGCA	......(((.(((....(((.((((((((((((((((((((((.(((....(((((((.....(((((....)))))..)))))))))))))))))))))))))))))))).)))....))).))).......	Unigene16757_All:193:325:-	74.247	160.003	1.1077	3.14194e-99
Pla-miR2118a-3p	TTCCCTAGGCCTCCCATGCCGA	22	-40.6	836	942	-	ACCTGAAGTTATAGGTATGGGATGCTGGGGAAAACGGCAAGAGACCCAATTTTCCCTAGGCCTCCCATGCCGATGATTTCCGG	.((.((((((((.(((((((((.(((((((((((.(((....).))...))))))))).)).))))))))).)))))))).))	CL6191.Contig1_All:53:135:+	59.7406	68.1697	0.190419	0.00544071
Pla-miR2118b-3p	TTCCCTAGGCCTCCCATGCCGA	22	-40.6	836	942	-	ACCTGAAGTTATAGGTATGGGATGCTGGGGAAAACGGCAAGAGACCCAATTTTCCCTAGGCCTCCCATGCCGATGATTTCCGG	.((.((((((((.(((((((((.(((((((((((.(((....).))...))))))))).)).))))))))).)))))))).))	CL8809.Contig1_All:743:825:-	59.7406	68.1697	0.190419	0.00544071
Pla-miR2118c-3p	TTCCCGAGGCCTCCCATGCCAA	22	-46.2	54259	69158	-	ACCGGAAGTTATAGGAATGGGAAGCTTGGGAAAATGGGTAAGAACCAATTTTCCCGAGGCCTCCCATGCCAATGATTTCCGG	.(((((((((((.((.((((((.((((((((((((.(((....))).)))))))).)))).)))))).)).)))))))))))	CL8809.Contig2_All:139:220:+	3877.35	5004.76	0.368229	0
Pla-miR393	CTTGGTTTTGGTAGGAGACAA	21	-82	15	11	-	TGCCTTCTCACTACTTCAACCAAAGTCAAGATATTGTTCATGATCTTCCATATTAGAAGCCGAAATAGCAAATCTCCTTCTAACCACTGCAGCAGTCCCTTCTAGTTCATGAACTTTCATGTTACAAGACATGTAGCTATTGCAGTCGCTCTCTACAAGAAATATCGCATCAAAGGTCATGTTGTCAAACTTATCTAGTAGCCACCTTTGGATACCATTTGGATGTTTTCCAACTTGCACCTATCTGATGTTGGAGTCGCTTGAACCAATGTTAGTGTTGATGGTATACCATCAGGAGAATACTTGGTTTTGGTAGGAGACAAGCAAGAACGT	.((.((((..((.((((.((((((((((((((((((((((.(...(((((..(((((((..((.........))..)))))))(.(((((((.(((..(.(((.((.(((((....)))))..)).)))...)..))).))))))).).(((.....)))......((((((.((((((.((((..((((..((((((((.(((....))).)))....)))))))))..)))).)).))))...)))))))))))...).)))).))))))...(.(((((((....))))))).).....)))))))))))).))))...))..)))).))	Unigene65537_All:168:500:-	1.0719	0.796037	-0.429264	0.461916
Pla-miR396	TTTCCCATGCCACCCATTCCTA	22	-69	854	1208	GGAATGGGTGTATGGGAGCA	TTGATCTCCCGGGGTTATTGGGAATGGGTGTATGGGAGCAATCTTTTGCCCTTCTTCCTTGTTCTATCTTTATTCTACCGAGTACTCGTTGTAGAAGAAACAAAAGAAGGTGTAACAAATTTTTCCCATGCCACCCATTCCTATTATTTCCGGGATTTCCTCC	..((..((((((((.((.((((((((((((((((((((.(((...(((((((((((..(((((...(((....((((((((....)))..)))))))))))))))))))).))))...))).)))))))).)))))))))))).)).))))))))..))....	Unigene4530_All:63:225:+	61.0269	87.4193	0.518508	5.55685e-16
Pla-miR397	TCCAAAGGGATCGCATTGATC	21	-51.9	18	0	TCATGCCATCCCTTTGGAAT	CGAGGAGGAATCCAAAGGGATCGCATTGATCCCAAACTATCCTTGAAAAAATGTTCAGGTATTGTTGAATTTGGATCATGCCATCCCTTTGGAATCCTCCTCC	.((((((((.(((((((((((.((((.(((((..(((.((.((((((......)))))).)).)))......))))))))).))))))))))).)))))))).	Unigene50185_All:8:110:+	1.28628	0.01	-7.00706	4.29863e-06
Pla-miR398c-3p	TTCCACAGCTTTCTTGAACTT	21	-54	14	0	CTCAAGAAAGCTGTGGGAGA	GTGTAAGTCCTGTCATGCTTTTCCACAGCTTTCTTGAACTTCTGCAAGTCTCCTGATTCAGCATAGAAGCTCAAGAAAGCTGTGGGAGAACATGGCGAGTCAGGACTAT	.....((((((((((((.(((((((((((((((((((.(((((((.((((....))))..))..))))).))))))))))))))))))).)))))).....))))))..	Unigene44651_All:39:147:+	1.00044	0.01	-6.64449	6.70703e-05
Pla-miR398d-3p	TTATTGAGTGCAGCGTTGAT	20	-41.6	14	0		GAAGAGCTGGTTATTGAGTGCAGCGTTGATTATGCGGAGGAGGTAAGTTTTACCTTGGACAACCTTCATCCTAAATGTATCTGAAGTTACAAAACATTAAAACGCATGAGCTCAGCTCTGATAAAAGTGACTTAACGGTGCGATCAGTGAGGAGTTTATCT	((.(((((..(((((((.((((.((((((((((..(((((((((..((((......)))).)))))).)))....((((........)))).............((.((((...))))))......)))).)))))).)))).)))))))..))))).)).	Unigene66811_All:23:183:-	1.00044	0.01	-6.64449	6.70703e-05
Pla-miR398e-3p	TGTGTTCTCAGGTCGCCCCTG	21	-53.5	14	0	-	GAGGAGTTCAACAGGGGCCGCCTGAGATCACATGAGGCCCCCATTAACGATGCCCAATTGGCTTTCTTACACTGTTACTGTGTATCCATGTGTTCTCAGGTCGCCCCTGCCGGACTTCT	.((((((((..(((((((.((((((((.(((((((((((....................)))))...(((((.......)))))..)))))).)))))))).)))))))..))))))))	CL8928.Contig1_All:29:147:+	1.00044	0.01	-6.64449	6.70703e-05
Pla-miR398a-3p	TGTGTTCTCAGGTCGCCCCTG	21	-53.5	5739	4745	-	GAGGAGTTCAACAGGGGCCGCCTGAGATCACATGAGGCCCCCATTAACGATGCCCAATTGGCTTTCTTACACTGTTACTGTGTATCCATGTGTTCTCAGGTCGCCCCTGCCGGACTTCT	.((((((((..(((((((.((((((((.(((((((((((....................)))))...(((((.......)))))..)))))).)))))))).)))))))..))))))))	CL8928.Contig3_All:196:314:-	410.109	343.381	-0.256196	1.19674e-19
Pla-miR398b-3p	TGTGTTCTCAGGTCACCCCTT	21	-55.1	5739	4745	GGAGTGGCACCTGAGAACACAGG	GCATACCCCAGAGGAGTGGCACCTGAGAACACAGGTGGTTCTGCCGCTACAAATTGGCTTTTATGCACTTGTGTTCTCAGGTCACCCCTTTGGGGCACAC	.....(((((((((.(((..(((((((((((((((((.....((((........)))).......)))))))))))))))))))).))))))))).....	Unigene22668_All:601:700:-	410.109	343.381	-0.256196	1.19674e-19
Pla-miR399a-3p	TGTGTTCTCAGGTCACCCCTT	21	-55.1	3809	1003	GGAGTGGCACCTGAGAACACAGG	GCATACCCCAGAGGAGTGGCACCTGAGAACACAGGTGGTTCTGCCGCTACAAATTGGCTTTTATGCACTTGTGTTCTCAGGTCACCCCTTTGGGGCACAC	.....(((((((((.(((..(((((((((((((((((.....((((........)))).......)))))))))))))))))))).))))))))).....	Unigene47015_All:59:158:+	272.191	72.5841	-1.9069	0
Pla-miR399b-3p	TGTGTTCTCAGGTCACCCCTT	21	-55.1	186	53	GGAGTGGCACCTGAGAACACAGG	GCATACCCCAGAGGAGTGGCACCTGAGAACACAGGTGGTTCTGCCGCTACAAATTGGCTTTTATGCACTTGTGTTCTCAGGTCACCCCTTTGGGGCACAC	.....(((((((((.(((..(((((((((((((((((.....((((........)))).......)))))))))))))))))))).))))))))).....	Unigene47015_All:758:857:-	13.2916	3.83545	-1.79304	2.42683e-18
Pla-miR399c-3p	TGCCAAAGGAGAGTTGCCCTG	21	-64.7	138	59	GGGCTTCTCTCCTAGGCAGG	TGCTAAGCGAAGAAGTCGTAGGGCTTCTCTCCTAGGCAGGTGATGGTGAGAGATGATGGTTTATCCACATTTGCTTCCAGTGACCTGCCAAAGGAGAGTTGCCCTGTGACTGTTTCAGCTTAATAT	...(((((((((.(((((((((((..(((((((.(((((((.((((.((((((((.(((.....)))))))).)))))).).)))))))..)))))))..))))))))))).)))).)))))....	CL3351.Contig2_All:7:132:+	9.86148	4.26965	-1.20769	2.10276e-08
Pla-miR399e-3p	TGCCAAAGGAGAGCTGCCCTG	21	-61.2	131	43	GGGCTTCTCTCCTAGGCAGG	TGCTAAGCGAAGAAGTCGTAGGGCTTCTCTCCTAGGCAGGTGATGGTGATAGATGATGGTTTATCTGCGTTTGCTTTCAATGACCTGCCAAAGGAGAGCTGCCCTGTGACTGCTTCAGCTTAATAT	...(((((((((.(((((((((((..(((((((.(((((((.((((((((((((((....)))))))...)))))....)).)))))))..)))))))..))))))))))).)))).)))))....	Unigene18649_All:33:158:+	9.36126	3.11178	-1.58896	1.79278e-11
Pla-miR399d-3p	TGCCAAAGGAGAATTGCCCTG	21	-54.3	1464	983	AGTGCAGTCCTCCTTTGGCAG	GTGTGGGGTAAGGGAATAACAGTGCAGTCCTCCTTTGGCAGAGAGGCCGTGCACATTTACTGCAGGACTGTTTGCCAAAGGAGAATTGCCCTGCTATTCTCCTGTCCAGTTAT	......((..((((((((.(((.(((((.(((((((((((((.((.((.((((.......)))))).)).))))))))))))).))))).))).))))).)))..))......	Unigene3516_All:537:649:-	104.617	71.1367	-0.556457	3.65603e-21
Pla-miR408a	TGCCAAAGGAGATTTGCCCGG	21	-49.7	47655	13546	-	TGCAGCTGCATTACAGGGCATTACCTTCTTTGGCAGTCGGCCACTCAACCTCACGTGCCTCAGCTACGTGTTCTCGCAGTGTGCCTACTGCCAAAGGAGATTTGCCCGGCAATTCTTCT	(((....))).....(((((....(((((((((((((.((((((((.....(((((((....)).))))).....).)))).))).)))))))))))))...)))))............	Unigene44096_All:1:119:+	3405.43	980.283	-1.79657	0
Pla-miR408b	CGCCAAAGGAGAGTTGCCCTC	21	-47.4	47655	13546	-	TGAACCAGTCGTAGGGCTCCTCCCTCTTGGCAGGTAATGGTGAGAGATGATGTTTATCTTTATTTGCACCCAATGGCCCGCCAAAGGAGAGTTGCCCTCTGACTGTTTC	.(((.((((((.(((((..((((((.(((((.(((...((((((((((((...)))))))).....)))).....))).)))))))).)))..))))).)))))).)))	Unigene48567_All:55:163:+	3405.43	980.283	-1.79657	0
Pla-miR447a	ACGGGGACGAGGCAGAGCACG	21	-53.8	24	36	ATGCACTGCCTCTTCCCTGGC	GCAGTTGTGGCAGTGGTCAGACGGGGACGAGGCAGAGCACGGGATGGATCAAACAACAGAGAGAGGAGCTGTTGTTGCTCTTCCCATGCACTGCCTCTTCCCTGGCTCTCCTCTTCCTTTCTCCAT	..((....((.((.((..((.((((((.(((((((.(((.((((.(((.(((.((((((.........))))))))).))))))).))).))))))).)))))).))..)).)).))...))....	CL6778.Contig1_All:863:988:-	1.71504	2.60521	0.603158	0.112151
Pla-miR447b	ACGGGGACGAGGCAGAGCACG	21	-53.8	71	67	ATGCACTGCCTCTTCCCTGGC	GCAGTTGTGGCAGTGGTCAGACGGGGACGAGGCAGAGCACGGGATGGATCAAACAACAGAGAGAGGAGCTGTTGTTGCTCTTCCCATGCACTGCCTCTTCCCTGGCTCTCCTCTTCCTTTCTCCAT	..((....((.((.((..((.((((((.(((((((.(((.((((.(((.(((.((((((.........))))))))).))))))).))).))))))).)))))).))..)).)).))...))....	CL6778.Contig2_All:781:906:-	5.07366	4.84859	-0.0654629	0.791302
Pla-miR482a-3p	ACTCTCCCTAAAGGGCTTCGA	21	-38.5	9	0	-	TCTTGCATTCACTCTCCCTAAAGGGCTTCGACCCCAACCACAATGGGTCGAGGTTAGAGCCCTTTTAGGTGGAGTTAATGAGAGT	.(((.((((.(((((.((((((((((((.((((.(.(((......))).).)))).)))))).)))))).))))).)))).))).	Unigene43884_All:134:218:-	0.64314	0.01	-6.00706	0.00207984
Pla-miR482d-3p	ACTCTCCCCAAAGGGCTTCAA	21	-43.6	14998	17877	-	CTAAGCATTTACTCTCCCCAAAGGGCTTCAATCCCCCACCACCTTGGGTCGAGGTTGAAGCCCTTCCGGGGGAGTCGATGAGAGC	.....((((.((((((((..((((((((((((((((((......))))..).)))))))))))))..)))))))).)))).....	Unigene46295_All:56:140:-	1071.76	1293.7	0.27153	4.83144e-65
Pla-miR482b-3p	CTTTCCTGTCCCGCCCATTCCA	22	-58.2	518	356	-	TGGGAAGCTTTTGGAGTGGGTAGGGCGGAAAGGTTTTTTTGTCTCCCAATTTCTTTGGGGAAAAATTCTCCTTTCCTGTCCCGCCCATTCCAATGGTTTCCC	.((((((((.(((((((((((.(((((((((((....(((.((.(((((.....))))))).)))....))))))).)))).))))))))))).))))))))	CL13603.Contig1_All:74:175:+	37.0163	25.7626	-0.52288	1.12128e-07
Pla-miR482e-3p	TTTCCAATCCCGCCCATTCCAT	22	-51.2	14998	17877	GGATTGGGCGCGGTGGAAAG	CTGAACCATCGGAAGCCTCCGGATTGGGCGCGGTGGAAAGAAATAGCATCAAAGATCTGTGTTTTCTCTTTCCAATCCCGCCCATTCCATAGGTTTCCGATTCTTCCCCC	..(((..(((((((((((..(((.((((((.((((((((((...((((.((......))))))...))))))))..)))))))).)))..)))))))))))..)))....	CL5344.Contig1_All:40:149:+	1071.76	1293.7	0.27153	4.83144e-65
Pla-miR482c-3p	TTTCCGATCCCACCCATGCCGAA	23	-51.7	518	356	-	TTGAGAAGCTTTTGGAGTGGGCGGGGCGGAAAGGTCTTCTCTCTCGGCAAGAGGAACTCCTTTCCGATCCCACCCATGCCGAAGGTTTCACTT	....(((((((((((.(((((.((((((((((((..(((.((((.....)))))))..)))))))).)))).))))).)))))))))))....	CL14503.Contig1_All:40:132:+	37.0163	25.7626	-0.52288	1.12128e-07
Pla-miR482f-3p	TTTCCAATCCCGCCCATTCCAT	22	-51.2	62	67	GGATTGGGCGCGGTGGAAAG	CTGAACCATCGGAAGCCTCCGGATTGGGCGCGGTGGAAAGAAATAGCATCAAAGATCTGTGTTTTCTCTTTCCAATCCCGCCCATTCCATAGGTTTCCGATTCTTCCCCC	..(((..(((((((((((..(((.((((((.((((((((((...((((.((......))))))...))))))))..)))))))).)))..)))))))))))..)))....	CL5344.Contig2_All:40:149:+	4.43052	4.84859	0.130088	0.609822
Pla-miR482g-3p	TTTCCGATCCCACCCATGCCGAA	23	-51.7	37	32	-	TTGAGAAGCTTTTGGAGTGGGCGGGGCGGAAAGGTCTTCTCTCTCGGCAAGAGGAACTCCTTTCCGATCCCACCCATGCCGAAGGTTTCACTT	....(((((((((((.(((((.((((((((((((..(((.((((.....)))))))..)))))))).)))).))))).)))))))))))....	CL14503.Contig2_All:40:132:+	2.64402	2.31574	-0.191258	0.586291
Pla-miR5143a-3p	TTCCGATCCCACCCATGCCAA	21	-42.9	17	13	-	ACTTTTGGAGTGGGTGGGGCGGAAAGGTCTTCCCTCTCGGCTTGAGGTACTCCCTTCCGATCCCACCCATGCCAAAGG	.(((((((.(((((((((((((((.((.....((((.......))))....)).))))).)))))))))).)))))))	Unigene1430_All:190:267:+	1.21482	0.940771	-0.368828	0.495206
Pla-miR5143b	TTTCCGATCCCACCCATGCC	20	-47.7	17	13	-	GGGAAGCTCTGGGCAGTGGTTGGGGCGGAAAGGCCTTCTTCTCTCTCTATATCTCTTGCAGCTTGAGAAAATCCTTTCCGATCCCACCCATGCCCATTGTTTCC	.((((((..((((((.(((.(((((((((((((.....(((((...((.((.....)).))...)))))...)))))))).))))).)))))))))..))))))	Unigene22052_All:127:230:-	1.21482	0.940771	-0.368828	0.495206
Pla-miR5143c	TGTGGATGTGCAAGTAGGAAT	21	-34.5	17	13	-	CTATACTGAATTTTCTTGCCAGCACCTATCCATGAAGTTAGTTCATATTTCAATTGTGTTCATGCATCTAATTTAGATTCTCTTTTGTTTATTGCTTTATAGACCTTTAATTCCTATCATGTTTATTGAATTAAACTGAATCTTGATCTGAACTTATGTGTGGATGTGCAAGTAGGAATCTCGTTTATG	......(((...(((((((..((((..(((((((..((.((((((....(((...((((....)))).......((((((..(((.(((((..((...((((...........))))...))....))))).)))..)))))))))..)))))).)).)))))))))))..)))))))..)))......	Unigene26592_All:343:531:+	1.21482	0.940771	-0.368828	0.495206
Pla-miR827a-3p	TGTGGATGTGCAAGTAGGAAT	21	-20.6	8528	3068	-	TGACTTCGTGTGTGGATGTGCAAGTAGGAATTTTGTTTATGTTTTATCATTACTCTTATAATTTTATTCCTAACTCCTTGTGCAGTAGGGCTGTCAATGGAGCGA	...((((((((.(...(((((((((((((((.....(((((...............)))))....)))))))....))))))))...).)).....))))))...	Unigene30088_All:128:232:+	609.411	222.022	-1.45671	0
Pla-miR827b-3p	TGTGGATGTGCAAGTAGGAAT	21	-26	8528	3068	-	TGAATTTGTGTGTGGATGTGCAAGTAGGAATTTTGTTTATGTTTATCGTTACTCTTATAATTTTATTCCTAACTCCTTGTGCACACACCCACTAGCCTATATGCATGCTGCATCAAATTTG	.......(((.(((..(((((((((((((((.....(((((..............)))))....)))))))....))))))))..))).)))........(((((...)))))........	Unigene7403_All:2:122:+	609.411	222.022	-1.45671	0
Pla-miR828a	AGAAGAGAGAGAGTACAGCTT	21	-66	38	31	GCTGTACCCTCTCTCTTCTTC	TTCTCATCAGGACTCATAGAAGAAGAGAGAGAGTACAGCTTCATGCACTCCAGAATGGAGGCAAGGAAGCTGTACCCTCTCTCTTCTTCTGTTCGTCTTTGATGAAATA	...((((((((((..((((((((((((((((.((((((((((.(((.(((((...))))))))..)))))))))).))))))))))))))))..))).)))))))....	CL12937.Contig1_All:129:237:-	2.71548	2.24338	-0.275536	0.433369
Pla-miR828b	TTAGATGACCATCAACAAACA	21	-38.2	38	31	TTTGTTGATTGTCATCTAAT	CTTCTGCGGCTATGAACATGTTTGTTGATTGTCATCTAATCATCGCTCTTTCTTAATGTTGCATATCTCATGAAATTATGGTTAGATGACCATCAACAAACACATTCGTGACAGTGCATTTC	....((((..((((((..(((((((((((.(((((((((((((.....((((...................))))..))))))))))))).)))))))))))..))))))....))))....	Unigene2538_All:34:155:+	2.71548	2.24338	-0.275536	0.433369
Pla-miR828c	TTAGATGACCATCAACAAACA	21	-38.4	38	31	TTTGTTGATTGTCATCTAAT	CTTCTGCGGCTATGAACATGTTTGTTGATTGTCATCTAATCATCGCTCTTTCTTAATGTTGCATATCTCATGAAATTATGGTTAGATGACCATCAACAAACACATTCGTGACAGTGCAATTT	....((((..((((((..(((((((((((.(((((((((((((.....((((...................))))..))))))))))))).)))))))))))..))))))....))))....	Unigene32163_All:34:155:+	2.71548	2.24338	-0.275536	0.433369
Pla-miR156c-3p	TCTTGCTCAAATGAGAATTCCA	22	-53.1	13	13	TGATACTCATTTGAGCAAGCAG	TATTAATGTTTCTTGCTCAAATGAGAATTCCAGCGGCCGCTGGAGTTCCCTACTTTGTTCTCTTTCCGTCTGCTGTGATACTCATTTGAGCAAGCAGCGTTAAAC	..((((((((.((((((((((((((.(((.((((((.((..((((..(........)..))))...)).)))))).))).)))))))))))))).))))))))..	CL9727.Contig1_All:285:411:-	0.92898	0.940771	0.0181951	0.973618
Pla-miR2868-3p	TCTTGCTCAAATGAGAATTCCA	22	-53.1	14	25	TGATACTCATTTGAGCAAGCAG	TATTAATGTTTCTTGCTCAAATGAGAATTCCAGCGGCCGCTGGAGTTCCCTACTTTGTTCTCTTTCCGTCTGCTGTGATACTCATTTGAGCAAGCAGCGTTAAAC	..((((((((.((((((((((((((.(((.((((((.((..((((..(........)..))))...)).)))))).))).)))))))))))))).))))))))..	CL9727.Contig2_All:844:970:-	1.00044	1.80917	0.854696	0.0740058
Pla-miR3633-3p	TCTTGCTCAAATGAGAATTCCA	22	-53.1	3846	3728	TGATACTCATTTGAGCAAGCAG	TATTAATGTTTCTTGCTCAAATGAGAATTCCAGCGGCCGCTGGAGTTCCCTACTTTGTTCTCTTTCCGTCTGCTGTGATACTCATTTGAGCAAGCAGCGTTAAAC	..((((((((.((((((((((((((.(((.((((((.((..((((..(........)..))))...)).)))))).))).)))))))))))))).))))))))..	CL9727.Contig3_All:82:208:+	274.835	269.784	-0.0267618	0.419688

## Sheet: Table S2
Table S2. The sequences of novel miRNAs identified from P. acerifolia.
miRNA	Seq（5P/3P）	Length	MFE	Expression		miRNA* sequences	sequences	struct	location	fold-change(log2 XLM-12-40/XLM-0)	p-value
				XLM-0	XLM-12-40
Pla-mir100	TGGATAGTATACGCTTGTGAA	21	-20.7	29	0	-	GCTCCTAGTTTGGATAGTATACGCTTGTGAATATTCTTGCTTTTTAAACTGAAATTATATGAGTATCAAGTGTTCAAAAAGTGATATAAATGTGAATGTGAATGTGGAAATAAATGGGAGA	.(((((((((((.((.((((.(((((.((((((((..(((((..................)))))...))))))))..)))))))))..)).))))).................)))))).	Unigene5354_All:335:455:+	-7.69509	2.24921e-09
Pla-mir101	TGGATGGCACAGGGTTTTCTT	21	-55	18	0	-	AATAAATATGTGGATGGCACAGGGTTTTCTTAATAGCAGTTTGACAGATTTGGAGAAGACTGAGGAGACTGGTAATGCGTACTGCAATGAGTTGGTAATGCGTTCTTTTTTCCAACGCAGTAAATTTTATAACTCAGATGAGATTTATTTCACATTGCACGATCTTTTGTATGATTATGCCCAATTCCTTACGAAGAATGAAATTTCTGTTATGGAGGTCAGAAGTCATTCACAAGTGCTGG	........((((((((((....(((((((.((((((.(((((.(....((((........(((((((...(((((..((((((((((((.........((((((.........))))))(((((((((((.......)))))))))))....))))))).........)))))..).))))...)))))))))))...).))))).)))))).)))))))....))))))))))........	Unigene5687_All:19:260:-	-7.00708	4.29863e-06
Pla-mir102	GGACGCAGCGGTTTATTGATC	21	-43.7	31	44	-	TGATGTCTCCGGACGCAGCGGTTTATTGATCTCTTCCTGGACTGCTTGCCAATTGAAGTAAAAGACAAAGCAGGAATCGGTCGATAAACCTCTGCATCCGGTGCTCT	.((.((..(((((.((((.((((((((((((..((((((...(((((..............))).))...))))))..)))))))))))).)))).))))).)))).	Unigene57465_All:68:174:-	0.523384	0.121568
Pla-mir103-3p	ATATGGGGGAATGTTAGGTGT	21	-90.6	15	9	-	TCCCTAATGAACGCCTAACGTCCTCCCATATGCAGGGGCGACACATGGTGACAAAAAGTGATTTACACTTTTAGGGGGTGATTTTCACTTTTTGGTGCCGTGTGTCCCCCTTTCATATGGGGGAATGTTAGGTGTTCATTAAGGG	.((((((((((((((((((((.((((((((((.(((((.((((((((((..((((((((((....((((((...))))))....))))))))))..)))))))))))))))..)))))))))).)))))))))))))))).))))	Unigene57923_All:1069:1213:-	-0.718776	0.242042
Pla-mir104	TGGGACACTCAGGGAGGGGAA	21	-54.2	24	0	-	CCCTCCCTGATGGGACACTCAGGGAGGGGAATCAAAAACCTCCAAAAAGTGAATTGATTCCGCCCCCTAGTGTCCCATCAGGGGGCG	..(((((((((((((((((.((((.((((((((((..((.........))...)))))))).)))))))))))))))))))))))..	Unigene59567_All:108:194:+	-7.42206	6.97477e-08
Pla-mir105a	TCAGGGGGCGGACACATCAGC	21	-72.2	36	44	TAATGTGCCCACCCCCTGACA	CCGCTCCCTGTCAGGGGGCGGACACATCAGCTCCGAAAAGTGTAAAACTTTTTAGGGGGGCACATATCACTTTTTGGCGCTAATGTGCCCACCCCCTGACAGGGAGCGGA	((((((((((((((((((.((.(((((.(((.((((((((((.....((((....))))........)))))))))).))).))))).)).)))))))))))))))))).	Unigene59825_All:4:113:+	0.307658	0.34437
Pla-mir105b	TCAGGGGGCGGACACATCAGC	21	-73.9	36	44	-	TGTGCACAGATCAGGGGGCGGACACATCAGCACCAAAACGTGATTTACACTTTTTGGGGCACACTTTTCACTTTCTGGTGCTGATGTGTCCAACCCCTGGTCCATGCACACGACTTGTGCACGTCTTTTGTGTGCACAA	((((((..(((((((((..((((((((((((((((.((.((((........................)))).)).))))))))))))))))..)))))))))..))))))....(((((((((.(....))))))))))	Unigene64476_All:159:297:-	0.307658	0.34437
Pla-mir108-3p	TCAGGGGGGTGGCGCAGATG	20	-65.3	25	26	-	TCAACGTCCTTTTTGCGCCACCCTCCCTGATGGGACACACACTCAGGGAGGAGAATCAAAAATATCCAAAAAAGTGAATCGACTCCCCCCCAATGTCCCATCAGGGGGGTGGCGCAGATGCACCCGTTTT	..((((.....((((((((((((.(((((((((((((........(((((..((.(((................))).))..)))))......)))))))))))))))))))))))))......))))..	Unigene69346_All:73:202:+	0.0747474	0.853902
Pla-mir109-3p	TGGGATAAGGCTGTTTGTTGT	21	-35.5	19	23	-	CTGAGTGGTTGGAACATAGGGCCTGATATTGCAGCATTTGTGTTTTTGGGTGTTAAACTTTAAACCCATTTTACCCAGAGAAACAGGGAAGCATGGATATTTTAGATTTGTGATTTTCAGTGGGATAAGGCTGTTTGTTGTAATTCAAATC	......(((((.((((.(.(((((..((((.((....((((.((((((((((...................)))))))))).))))((((((((((((.......))))))).)))))..)).))))))))).).)))).)))))......	Unigene7786_All:65:215:+	0.293837	0.515191
Pla-mir10a	TATGAGCGACTGGTAGATGCA	21	-21.7	165	155	CGTAACTGGTAGATGCCTCATGCC	AGCCTCTGCATATGAGCGACTGGTAGATGCAACCTCTACGTGTGCGTAACTGGTAGATGCCTCATGCCTAGATGGGCC	.(((((((..((((((((.(((.((((((((((......)).)))))..))).))).)).))))))..))))..))).	CL1365.Contig2_All:760:837:-	-0.0719998	0.656328
Pla-mir10b	TATGAGCGACTGGTAGATGCA	21	-21.7	165	155	CGTAACTGGTAGATGCCTCATGCC	AGCCTCTGCATATGAGCGACTGGTAGATGCAACCTCTACGTGTGCGTAACTGGTAGATGCCTCATGCCTAGATGGGCC	.(((((((..((((((((.(((.((((((((((......)).)))))..))).))).)).))))))..))))..))).	CL1365.Contig3_All:1126:1203:-	-0.0719998	0.656328
Pla-mir111-3p	CTAATACATCAGGAAAAGCAG	21	-22.8	32	22	-	AAATCTGCTTTTAATGTATTGGAGCGTGTCAACCCCCTGTGTCATTCTAATACATCAGGAAAAGCAGATT	.(((((((((((.((((((((((..(((.((........)).)))))))))))))....)))))))))))	Unigene9086_All:1:70:-	-0.522336	2.86504e-10
Pla-mir117a	TTTCAAATTTCCAAGGCATTT	21	-80.1	0	19	-	AATCATTTCATTTCAAATTTCCAAGGCATTTGCAGTCGTAAAGTGATGGCTCAAAATGAACTCATTCCGATTTAGACTGACTTGTTAACTAAAATTATAGATGAAGTCATCATAGGTTTTTTAGAAAATGAAATGATATACGTTATCAAGCATAAATCTGAATGAGTTCATTATGAACCAACACCTGGTGGGTACAAATGCATTGGAAATTTGCAATGAAATGATTA	((((((((((((.(((((((((((.(((((((.(.(((....(((.(((.(((.(((((((((((((.((((((..((..........((((((((((.((((....))))))))...)))))).........(((((.....)))))))..)))))).))))))))))))).))).))).)))....))).).))))))).))))))))))).)))))))))))).	CL11547.Contig3_All:1098:1324:+	7.10329	1.68068e-06
Pla-mir117b	TTTCAAATTTCCAAGGCATTT	21	-81.4	0	19	-	AATCATTTCATTTCAAATTTCCAAGGCATTTGCAGTCGTAAAGTGATGGCTCAAAATGAACTCATTCCGATTTAGACTGACTTGTTAACTAAAATTATAGATGAAGTCATCATAGGTTTTTTAGAAAATGAAATGATATACGTCATCAAGCATAAATCTGAATGAGTTCATTATGAACCAACACCTGGTGGGTACAAATGCATTGGAAATTTGCAATGAAATGATTA	((((((((((((.(((((((((((.(((((((.(.(((....(((.(((.(((.(((((((((((((.((((((...((.((((....((((((((((.((((....))))))))...))))))........(((((....))))))))))))))))).))))))))))))).))).))).)))....))).).))))))).))))))))))).)))))))))))).	CL11547.Contig4_All:1098:1324:+	7.10329	1.68068e-06
Pla-mir117c	TTTCAAATTTCCAAGGCATTT	21	-76.2	0	19	-	AGTCACTTCATTTCAAATTTCCAAGGCATTTGCAGTCGTAAAGTGATGGCTCAAAATGAACTCATTCCGATTTAGACTGACTTGTTAACTAAAATTATAGATGAAGTCATCATAGGTTTTTTAGAAAATGAAATGATATACGTTATCAAGCATAAATCTGAATGAGTTCATTATGAACCAACACCTGGTGGGTACAAATGCATTGGAAATTTGCAATGAAATGATTA	(((((.((((((.(((((((((((.(((((((.(.(((....(((.(((.(((.(((((((((((((.((((((..((..........((((((((((.((((....))))))))...)))))).........(((((.....)))))))..)))))).))))))))))))).))).))).)))....))).).))))))).))))))))))).)))))).))))).	Unigene23588_All:235:461:+	7.10329	1.68068e-06
Pla-mir11a-3p	TAAAGTCTGGCATCATCTACA	21	-26.5	20	20	-	GATTGCGTTCTGAGATGACTGCCGGAGGTTGAAATTGTCTACTACAGCATGAAATATGGTAAAGTCTGGCATCATCTACAGTGCGTTATG	....((((.(((((((((.(((((((..(((......((...........)).......)))..))))))))))))).))).))))....	CL13895.Contig2_All:76:165:-	0.0181562	0.967595
Pla-mir11b	TAAAGTCTGGCATCATCTACA	21	-53.5	20	20	-	CTACAGCTTGTAAAGTCTGGCATCATCTACAGTAGGACACGTACCCCAAAAAAGCAAAAAAATAAATTTTGATTCGAAATTATTACTTTTTGATAGGTGATTTCCAATTTTAGGGGGTAGGTGTCGCATTATGGACGATACCAGACTTTACCACACTTCAAGCT	....((((((((((((((((.(((.((((.(((..(((((.((((((..((((...........(((((((...)))))))(((((((......)))))))......))))..)))))).)))))..))).)))).))).)))))))))))........)))))	Unigene21330_All:1:164:-	0.0181562	0.967595
Pla-mir120-3p	TCAGGGGCGGACACATCAGTG	21	-74.1	0	44	-	ATCATGTCAACGGGTTGTCTGCTTTGACCCAAAACACGGTTACAAACAACCCTAACCCGTTTATATCATGTGGGGTTCATGGATCATGTCAAACAATGCCACGCTTATTTTGTGAATTATAAACTGGCATATACTGTTTTAGGGGTAAAAACATTGAAAAAAAGTGCTCACTTGAAAAAGTAGGTGGTTAAAAAAAGACATCAAATTTAAAACACATCACATGTCGATCAATGGCAAGCTTTTAGAGATCCCTCCGTCGGGATCGATTTATAAACGCTTCCCTTAGCAAAAACTCACCACCACAACCTGTCAGGGGCGGACACATCAGTGTTGAAAAGTG	......((((((((((((((((((((((...((((..(((((..........))))).))))......((((((((.((((...))))..(((((((((((.(.((((..(....)..)))).)))))))....)))))((((((......((((((....((.((((.((((....)))).)))).)).......(((((...................)))))..))))))..((((.((((..((((((......))))))......)))).))))))))))..........))).)))))....)))).))))))))).)))..))))))......	CL12505.Contig2_All:595:934:+	8.31474	4.27615e-14
Pla-mir122	GTGGACGTCATATGGAATAAA	21	-46.3	627	724	-	TCCACGATGGCGTCAAAGTTACCAGTGGACGTCATATGGAATAAAATGTGTTGGAATTTGAAAATTTTTTAACTCCCACCCATTTTATTTCATATGACGTCCCCTGGTCATCGTGG	.((((((((((......)).(((((.((((((((((((((((((((((.((.(((..((((((...)))))).))).)).)))))))))))))))))))))).)))))))))))))	CL14772.Contig1_All:482:597:-	0.225721	9.30314e-188
Pla-mir12-3p	TCAGCCCTGATGTCATTCCAA	21	-50.5	22	0	-	GTGGCTAAAGTCGGAATTACAAAAGGGCTGACACTTAAGTGTAGAAAAAGTGATACACTTTTTGGGGGATGCTTTTCACTTTTTGGCACTGATGTGTCAGCCCTGATGTCATTCCAAATTTACCCGA	.(((.((((...(((((.(((..(((((((((((...(((((..(((((((((..((((((...)))).))....))))))))).)))))...)))))))))))..))).)))))...)))).))).	CL14314.Contig2_All:163:289:+	-7.29655	2.75505e-07
Pla-mir130a-3p	CGAAGGGGGGGCTGGGGAAGGC	22	-105.1	0	15	-	CCAGAAGCGACGAAGGGGGGGCTGGGGAAGGCCGACGACTACATGAGGGGGAAGCTGTCGTAGAAGCTTTGCCCCTTGCTTTACAGAGATTGTTATGAACTGACTAAATGACTAGATTCTCCCGGAACGCTAGCTAAGCTAATAGTATTAGTTCCCTTCAATCAAATCAATAAGAACGCCGCCCTCCTTCTTAGAACCCATTGAGGGGGGCCTCGGCCCGGGAAGGGGAGAGTGGCCGAGTGGTCAAAAGCGACAGACTGTAAATCTGTTGAAGGTTTTCTACGTAGGTTCGAATCCTGCCTCTCCCACTTGTTGTAGACTTCAGA	...((((((((((.((((((((.(((...((((.(((.......((((((((((((........)))))).))))))........((((..(((((...........))))).....))))..(((((....((((......))))....))))).................((((.((((((((((((.............)))))))))(((..(((.....)))..)))(((((....)))))....(((((((.......)))))))..))).)))).))).))))....))).))))))))...))))))....))))...	CL3503.Contig4_All:1177:1502:-	6.76222	2.758e-05
Pla-mir130b	CGAAGGGGGGGCTGGGGAAGGC	22	-105.1	0	15	-	CCAGAAGCGACGAAGGGGGGGCTGGGGAAGGCCGACGACTACATGAGGGGGAAGCTGTCGTAGAAGCTTTGCCCCTTGCTTTACAGAGATTGTTATGAACTGACTAAATGACTAGATTCTCCCGGAACGCTAGCTAAGCTAATAGTATTAGTTCCCTTCAATCAAATCAATAAGAACGCCGCCCTCCTTCTTAGAACCCATTGAGGGGGGCCTCGGCCCGGGAAGGGGAGAGTGGCCGAGTGGTCAAAAGCGACAGACTGTAAATCTGTTGAAGGTTTTCTACGTAGGTTCGAATCCTGCCTCTCCCACTTGTTGTAGACTTCAGA	...((((((((((.((((((((.(((...((((.(((.......((((((((((((........)))))).))))))........((((..(((((...........))))).....))))..(((((....((((......))))....))))).................((((.((((((((((((.............)))))))))(((..(((.....)))..)))(((((....)))))....(((((((.......)))))))..))).)))).))).))))....))).))))))))...))))))....))))...	CL3503.Contig5_All:1177:1502:-	6.76222	2.758e-05
Pla-mir130c	CGAAGGGGGGGCTGGGGAAGGC	22	-105.1	0	15	-	CCAGAAGCGACGAAGGGGGGGCTGGGGAAGGCCGACGACTACATGAGGGGGAAGCTGTCGTAGAAGCTTTGCCCCTTGCTTTACAGAGATTGTTATGAACTGACTAAATGACTAGATTCTCCCGGAACGCTAGCTAAGCTAATAGTATTAGTTCCCTTCAATCAAATCAATAAGAACGCCGCCCTCCTTCTTAGAACCCATTGAGGGGGGCCTCGGCCCGGGAAGGGGAGAGTGGCCGAGTGGTCAAAAGCGACAGACTGTAAATCTGTTGAAGGTTTTCTACGTAGGTTCGAATCCTGCCTCTCCCACTTGTTGTAGACTTCAGA	...((((((((((.((((((((.(((...((((.(((.......((((((((((((........)))))).))))))........((((..(((((...........))))).....))))..(((((....((((......))))....))))).................((((.((((((((((((.............)))))))))(((..(((.....)))..)))(((((....)))))....(((((((.......)))))))..))).)))).))).))))....))).))))))))...))))))....))))...	CL3503.Contig6_All:1177:1502:-	6.76222	2.758e-05
Pla-mir130d	CGAAGGGGGGGCTGGGGAAGGC	22	-105.1	0	15	-	CCAGAAGCGACGAAGGGGGGGCTGGGGAAGGCCGACGACTACATGAGGGGGAAGCTGTCGTAGAAGCTTTGCCCCTTGCTTTACAGAGATTGTTATGAACTGACTAAATGACTAGATTCTCCCGGAACGCTAGCTAAGCTAATAGTATTAGTTCCCTTCAATCAAATCAATAAGAACGCCGCCCTCCTTCTTAGAACCCATTGAGGGGGGCCTCGGCCCGGGAAGGGGAGAGTGGCCGAGTGGTCAAAAGCGACAGACTGTAAATCTGTTGAAGGTTTTCTACGTAGGTTCGAATCCTGCCTCTCCCACTTGTTGTAGACTTCAGA	...((((((((((.((((((((.(((...((((.(((.......((((((((((((........)))))).))))))........((((..(((((...........))))).....))))..(((((....((((......))))....))))).................((((.((((((((((((.............)))))))))(((..(((.....)))..)))(((((....)))))....(((((((.......)))))))..))).)))).))).))))....))).))))))))...))))))....))))...	Unigene31560_All:1746:2071:-	6.76222	2.758e-05
Pla-mir130e	CGAAGGGGGGGCTGGGGAAGGC	22	-105.1	0	15	-	CCAGAAGCGACGAAGGGGGGGCTGGGGAAGGCCGACGACTACATGAGGGGGAAGCTGTCGTAGAAGCTTTGCCCCTTGCTTTACAGAGATTGTTATGAACTGACTAAATGACTAGATTCTCCCGGAACGCTAGCTAAGCTAATAGTATTAGTTCCCTTCAATCAAATCAATAAGAACGCCGCCCTCCTTCTTAGAACCCATTGAGGGGGGCCTCGGCCCGGGAAGGGGAGAGTGGCCGAGTGGTCAAAAGCGACAGACTGTAAATCTGTTGAAGGTTTTCTACGTAGGTTCGAATCCTGCCTCTCCCACTTGTTGTAGACTTCAGA	...((((((((((.((((((((.(((...((((.(((.......((((((((((((........)))))).))))))........((((..(((((...........))))).....))))..(((((....((((......))))....))))).................((((.((((((((((((.............)))))))))(((..(((.....)))..)))(((((....)))))....(((((((.......)))))))..))).)))).))).))))....))).))))))))...))))))....))))...	Unigene31561_All:1177:1502:-	6.76222	2.758e-05
Pla-mir130f	CGAAGGGGGGGCTGGGGAAGGC	22	-105.1	0	15	-	CCAGAAGCGACGAAGGGGGGGCTGGGGAAGGCCGACGACTACATGAGGGGGAAGCTGTCGTAGAAGCTTTGCCCCTTGCTTTACAGAGATTGTTATGAACTGACTAAATGACTAGATTCTCCCGGAACGCTAGCTAAGCTAATAGTATTAGTTCCCTTCAATCAAATCAATAAGAACGCCGCCCTCCTTCTTAGAACCCATTGAGGGGGGCCTCGGCCCGGGAAGGGGAGAGTGGCCGAGTGGTCAAAAGCGACAGACTGTAAATCTGTTGAAGGTTTTCTACGTAGGTTCGAATCCTGCCTCTCCCACTTGTTGTAGACTTCAGA	...((((((((((.((((((((.(((...((((.(((.......((((((((((((........)))))).))))))........((((..(((((...........))))).....))))..(((((....((((......))))....))))).................((((.((((((((((((.............)))))))))(((..(((.....)))..)))(((((....)))))....(((((((.......)))))))..))).)))).))).))))....))).))))))))...))))))....))))...	Unigene9237_All:1177:1502:-	6.76222	2.758e-05
Pla-mir135a-3p	TGCAGAACTGTTGGAGAGAGC	21	-55.1	0	17	TCTCTCCCACAGTTCTGTTGT	AGCTTGGCATCGCTCTCTCCCACAGTTCTGTTGTCGTCTCTGTCTTCTGCAAACCCGACTTCTCTTCTGGGGATGGCCCGAAAGACGAAGTGACATCTACGAAATCTGGATTTGTGTTTGCAGAACTGTTGGAGAGAGCAATTCCAGTG	.(((.((.((.(((((((((.((((((((((..((((...((((.............(((((((((.((((.....)))).)))).)))))))))...)))).................)))))))))).))))))))).)).))))).	CL57.Contig1_All:620:768:-	6.94275	6.80831e-06
Pla-mir135b-3p	TGCAGAACTGTTGGAGAGAGC	21	-55.1	0	17	TCTCTCCCACAGTTCTGTTGT	AGCTTGGCATCGCTCTCTCCCACAGTTCTGTTGTCGTCTCTGTCTTCTGCAAACCCGACTTCTCTTCTGGGGATGGCCCGAAAGACGAAGTGACATCTACGAAATCTGGATTTGTGTTTGCAGAACTGTTGGAGAGAGCAATTCCAGTG	.(((.((.((.(((((((((.((((((((((..((((...((((.............(((((((((.((((.....)))).)))).)))))))))...)))).................)))))))))).))))))))).)).))))).	CL57.Contig2_All:620:768:-	6.94275	6.80831e-06
Pla-mir135c-3p	TGCAGAACTGTTGGAGAGAGC	21	-55	0	17	TCTCTCCCACAGTTCTGTTGT	AGCTTGGCATCGCTCTCTCCCACAGTTCTGTTGTCGTCTCTGTCTTCTGCAAACCCGATTTCTCTTCTGGGGATGGCCCGAAAGACGAAGTGACATCTACGAAATCTGGATTTGTGTTTGCAGAACTGTTGGAGAGAGCAATTCCAGTG	.(((.((.((.(((((((((.(((((((((((((((.((.(((((((.((...(((((.......)).)))....))..).)))))).)))))))..((((((.......))))))...)))))))))).))))))))).)).))))).	CL57.Contig4_All:353:501:+	6.94275	6.80831e-06
Pla-mir136	TGATTGTGAGCGTTTAGATGT	21	-19.3	0	43	ATCTGAAGTTGGAGCACTTACG	TTATTCTGCGTGATTGTGAGCGTTTAGATGTGCTGCCATCTGAAGTTGGAGCACTTACGCATCTTGA	......(((((((.(((.(((.((((((((......)))))))))))...))).)))))))......	CL6110.Contig1_All:112:178:+	8.28161	8.60658e-14
Pla-mir137	TCACAAGGGAGGTAGCGTAGAG	22	-64.5	0	119	-	ATTGAGTGGCTCACAAGGGAGGTAGCGTAGAGGATTTCAGGCCCCTAATAGGCCATGAGGAGGCCGGATAGGATCCAAACCGTCTCCAGAGTGTTCACCACTTTGCCATCAAACCTTGGCTCTTCAAACTGGGGGAAGTATCTTCTGTGCCGCCCTCCTTTGTGCGACTTCAT	...((((.((..(((((((((((.(((((((((((.(((((((.......)))).)))((((((.((((...)))).....))))))((((((.....))))))((((........))))(((((......)))))...))))))))))).).)))))))))))).))))...	CL6205.Contig2_All:44:216:-	9.75015	7.04302e-37
Pla-mir139a	GCAGGAACGGTAGCTGCCCGC	21	-33.4	0	14	-	CTTACCAGTAGCAGGAACGGTAGCTGCCCGCTTGATGTTGCCCAAGAGCAGCACGAGGTAGCGACCGGTCTGCCGCTAACCTT	......(((.(((((..((((.((((((((.....((((((......)))))))).)))))).)))).))))).)))......	CL6666.Contig2_All:235:317:+	6.66263	5.551e-05
Pla-mir139b	GCAGGAACGGTAGCTGCCCGC	21	-33.6	0	14	-	CTTACGAGTAGCAGGAACGGTAGCTGCCCGCTTGATGTTGCCCAAGAGCAGCACGAGGTAGCGACCGGTCTGCCGCTAACCTT	......(((.(((((..((((.((((((((.....((((((......)))))))).)))))).)))).))))).)))......	CL6666.Contig4_All:93:175:-	6.66263	5.551e-05
Pla-mir13a	GGAGTGGGCGGGGCGGAAAGG	21	-51.7	1033	1566	-	AGAAGCTTTTGGAGTGGGCGGGGCGGAAAGGTCTTCTCTCTCGGCAAGAGGAACTCCTTTCCGATCCCACCCATGCCGAAGGTTTCA	.(((((((((((.(((((.((((((((((((..(((.((((.....)))))))..)))))))).)))).))))).))))))))))).	CL14503.Contig1_All:43:129:+	0.618439	3.07702e-27
Pla-mir13b	GGAGTGGGCGGGGCGGAAAGG	21	-51.7	1033	1566	-	AGAAGCTTTTGGAGTGGGCGGGGCGGAAAGGTCTTCTCTCTCGGCAAGAGGAACTCCTTTCCGATCCCACCCATGCCGAAGGTTTCA	.(((((((((((.(((((.((((((((((((..(((.((((.....)))))))..)))))))).)))).))))).))))))))))).	CL14503.Contig2_All:43:129:+	0.618439	3.07702e-27
Pla-mir141a	GGATCTTTTATCCTGGTCGGAGG	23	-32	0	14	-	AGCTTCAATGGGATCTTTTATCCTGGTCGGAGGAGAAATTACCAAACGTCTAGCATTCCCTCACGCTAGGGTAATGATCCACCAACCTGCTAGTTCTTTTTATGAGGCA	.((((((...(((((..(((((((((.((((((.(((..................))))))).))))))))))).)))))...(((......))).......)))))).	CL8054.Contig2_All:2377:2485:-	6.66263	5.551e-05
Pla-mir141b	GGATCTTTTATCCTGGTCGGAGG	23	-32	0	14	-	AGCTTCAATGGGATCTTTTATCCTGGTCGGAGGAGAAATTACCAAACGTCTAGCATTCCCTCACGCTAGGGTAATGATCCACCAACCTGCTAGTTCTTTTTATGAGGCA	.((((((...(((((..(((((((((.((((((.(((..................))))))).))))))))))).)))))...(((......))).......)))))).	CL8054.Contig4_All:3271:3379:-	6.66263	5.551e-05
Pla-mir143	TTAATGAGGGTGGCTGCTGCT	21	-100.4	0	19	-	AATGCTAGGATTAATGAGGGTGGCTGCTGCTCCTGTGTCAAAATAAGCTACTACTGGAACTGGTCTGTGGAGATGGGTGGGTTTGATGAAAATTTGGGCGGTCGGAGACGGTTGGACCAAATGGGATGGGGCTATGACCAATTCTGCCTGATGCTGGGAGGGATGATCATCTTCTTCTCCAGAAGAGTAGACTGGGATTGCTAACAGGGAATCCGGGGAGTAGGAGTCTTCCAGGGAGAAATAGGATTCTACATCAGAGAGTTCTGAGTCTGTTAGCTACTGTGCTTGTTGGAGAAAGTGGATGCTGCAGTCTCTTTTGGGACAATCTTTTGCAAA	..(((.((((((..((((((.((((((.(((((..(.((..(((((((.((.......(((.((((....)))).))).(((((.((....((((((.((((((....))))))..))))))...)).)))))....(((..(((((((....((((((((((........)))))).)))).)).))))).)))....(((((((((...(((.(((((.......)))))..)))....(((((((((.......)))))))))..)))))))))....))))))))).)).)....))).)).)))))).))))))....))))))..)))..	CL8900.Contig1_All:37:372:+	7.10329	1.68068e-06
Pla-mir145	TTAAAGTGGAGCAAGTTTCGG	21	-59.3	0	58	-	TAAAGTTCAGTTAAAGTGGAGCAAGTTTCGGTGGTCAACATGTTGCAAAAAAAATCACAAAACTGACATGATAAAGTTCAGGATTTTTTGGATTCATGTTGACCACTGAAATTTGCTACCCTTTAACTAAACCTTA	....(((.((((((((.(((((((((((((((((((((((((......((((((((.(..((((..........))))..))))))))).....))))))))))))))))))))))).)))))))))).)))....	Unigene14404_All:199:334:-	8.71332	2.38876e-18
Pla-mir154	AGGACCTGTGTACAACCAAAG	21	-65.6	0	21	-	ATGACCTGTTAGGACCTGTGTACAACCAAAGTGCACGTTTGGCATAAAAAAAAATGGTCATACATAGGTTGTGCACATCTTTTTATGCCAGACCATGCACTTAAATTGTGGACAGATCCTAACAGGTCATA	((((((((((((((.((((.(((((...(((((((.((((((((((((((...(((..((((.......))))..))).))))))))))))))..)))))))...))))).)))).)))))))))))))).	Unigene28076_All:46:176:+	7.24764	4.14887e-07
Pla-mir155	CATCAGGGCCAACACATCAGT	21	-34.8	0	32	-	CTGTGGGAGACATCAGGGCCAACACATCAGTGTGCCAAAAAGTGAAGAGCATCCCCCCAAAAAACTGTATATGTCACTTTTCAGCACTAATGTGTCAACCCTTATGTCATTCGTACTT	..(((.(((((((.((((...((((((.(((((....((((((((...(((..............))).....))))))))..))))).))))))...)))).)))))..)).)))..	Unigene28171_All:92:209:+	7.8553	1.88965e-10
Pla-mir158	TCACAATTGGAAAATGATCTC	21	-58.7	0	55	AGATCCTTTTCCAATTGTGAA	TTTTTGGCAAAAGCTATGTTTCACAATTGGAAAATGATCTCCTACACTTAAATTTGTGTGAGGACGTGGAGGAACAGAAAATTTGGGTGTAGGAGATCCTTTTCCAATTGTGAAACATAACCTCCTATTAAGAA	......((....))((((((((((((((((((((.((((((((((((((((((((.(((..............)))..)))))))))))))))))))).))))))))))))))))))))...............	Unigene32763_All:161:294:-	8.6367	1.94762e-17
Pla-mir161	CGCCAAAGGAGAGTTGCCCTC	21	-51.1	0	42	AGGGCTCCTCCCTCTTGGCAGG	TTGCTAAGTGAACCAGTCGTAGGGCTCCTCCCTCTTGGCAGGTAATGGTGAGAGATGATGTTTATCTTTATTTGCACCCAATGGCCCGCCAAAGGAGAGTTGCCCTCTGACTGTTTCAACTTCATAT	.....(((((((.((((((.(((((..((((((.(((((.(((...((((((((((((...)))))))).....)))).....))).)))))))).)))..))))).)))))).))).)))).....	Unigene48567_All:47:173:+	8.24764	1.73224e-13
Pla-mir162	TCAGACAAGTTTGGAAAGGAT	21	-59.6	0	15	TCCTTTCCAAACTTGTCTGATG	AATAGCAACATCAGACAAGTTTGGAAAGGATGCAACTTGCTGAGCAACTTGAATCCTTTCCAAACTTGTCTGATGTTGCTATTT	(((((((((((((((((((((((((((((((.(((.((((...)))).))).))))))))))))))))))))))))))))))).	Unigene57874_All:60:143:+	6.76222	2.758e-05
Pla-mir163	TCAGACAAGTTTGGAAAGGATT	22	-57	0	108	CCTTTCCAAACTTGTCTGATG	AATAGCAACATCAGACAAGTTTGGAAAGGATTCAAGTTGCTCAGCAAGTTGCATCCTTTCCAAACTTGTCTGATGTTGCTATTT	(((((((((((((((((((((((((((((((.(((.((((...)))).))).))))))))))))))))))))))))))))))).	Unigene57874_All:59:142:-	9.61021	1.54635e-33
Pla-mir164	TGAAGTGTGGTAAAGTCTGGC	21	-78.6	0	29	-	TACTACAGCTTGAAGTGTGGTAAAGTCTGGCATCGTCCACAATGCCACATCTACCCTAAAATTTTGGAAATCACCTATCAAAAGTGAAAATGACCAATAAAAAATTGTTTTTACACTTTTTGGGGGGTACATGTCACACTGTAGATGATGATGCCAGACTTTACAATACTTCAAGCTGTAGTAG	((((((((((((((((((.((((((((((((((((((((((.((..((((.(((((.................((((..(((((((.(((....((((.....))))..))).)))))))))))))))).))))..)).))).)..)))))))))))))))))).)))))))))))))))))).	Unigene59447_All:47:230:+	7.71328	1.54068e-09
Pla-mir166	GCCGACTTGCACCATCCGAGT	21	-46.2	0	182	-	GAATTCGCTTGGTGCAGGTCGGGCACTTGGATTTCGCATGGTTTCAATAACCTTGATTTGCGAATCAAATGCCGACTTGCACCATCCGAGTTCAATCCCTC	(((((((..(((((((((((((.((.((((..((((((.....((((.....))))..)))))))))).)))))))))))))))..)))))))........	Unigene61269_All:136:236:-	10.3631	5.12615e-56
Pla-mir170-3p	TGAAGAGGGTGACAGTCTCC	20	-88.9	0	48	GAGGCTGTCACTCCCCTTCACA	CATGGCGGTCCAAGGAGATGGAGGCTGTCACTCCCCTTCACATTCTCTTTGCTGCCGTCAAAGCATGATCTCATGCCTATGGGTGGACTTCAATTTGCAGGAGGTCATGCTTCATAGTGAAACAGATGAGGGGAATGAATCAGTGAAGAGGGTGACAGTCTCCTTCTTCTTGTGATTCGCCAA	..((((((((((((((((.((((((((((((.((.(((((((((((((((((((...(((((((((((((((.(((..((.((......)).))..))).)))))))))))).....)))..))).))))))))))......)))))).)))))))))))))).)))))))).)).)))))).	Unigene64675_All:21:203:+	8.44029	2.60582e-15
Pla-mir172	CTAACAGGTCGATATGTCACC	21	-41.2	0	14	TGACGTGTCAACCTATTAGGC	CCTGCCTGGCCTAACAGGTCGATATGTCACCAAACAGGGTTTGCATCCTGTCCGGCCTCTATTTTCGGTGACGTGTCAACCTATTAGGCAAGACAGA	.(((.((.((((((.((((.(((((((((((..(((((((....)))))))...............))))))))))).)))).)))))).)).))).	Unigene64971_All:214:310:+	6.66263	5.551e-05
Pla-mir174a	ACTTGGGTTGTGGACAGGTCC	21	-82	0	194	-	CCATGCACTTGGGTTGTGGACAGGTCCTAATAGGACATTAGTAAACAAGACAGGATCTAAACTGCCTCTTTTTTTTATGTGTTTTCTCTCTATATTCTTTCACATGAGATAAAAAGGAGAAAAAGGAAAGGATCCTGTCCTGTATCTCCTGACCTGTTCACAACCTAAGTGCATGGA	((((((((((((((((((((((((((.....((((.((......(((.((((((((((...((..((((((((((((((((...................)))))))))...)))))))....))....)))))))))).))))).)))))))))))))))))))))))))))))).	Unigene66351_All:573:749:-	10.4552	1.16002e-59
Pla-mir174b	ACTTGGGTTGTGGACAGGTCC	21	-82	0	194	-	CCATGCACTTGGGTTGTGGACAGGTCCTAATAGGACATTAGTAAACAAGACAGGATCTAAACTGCCTCTTTTTTTTATGTGTTTTCTCTCTATATTCTTTCACATGAGATAAAAAGGAGAAAAAGGAAAGGATCCTGTCCTGTATCTCCTGACCTGTTCACAACCTAAGTGCATGGA	((((((((((((((((((((((((((.....((((.((......(((.((((((((((...((..((((((((((((((((...................)))))))))...)))))))....))....)))))))))).))))).)))))))))))))))))))))))))))))).	Unigene66352_All:560:736:-	10.4552	1.16002e-59
Pla-mir176-3p	TGGGTGACATGTTGCGGATAA	21	-118	0	27	-	GGTTCTTACTTATGCCCAACATGAAATTGCCCAAAAATCCGCATTCTTTGGCAAGTGGGAGTGCCGAAGCCTGCTCATCGGCTTGCTTGAACGACTGTTCTTGCACTGCTTATGCTTATGTCAGTGGGGGGTGTTCAGTATGGAATGGAGATCTGTTGAATCTGCAACAACTCTCAGACGGTGATACTGGTGGAGGAGATCTCCACATCAAACTTGCTGCTGCTGACCTTCCGAGATCTGGAGGTAAGAAGGGGAAAATTACTGGTGCTATTGTGGGTACTAAAGCAGATTTCCTGCAGCGCTAATCCTTGTGCCTGAAACCCAAGGCGCTGGGTGACATGTTGCGGATAAAGTGAAAAAA	.....((((((...(((((((((...(((((((....((.((((((((........)))))))).))(((((((.(((.(((.(((..((((....))))..)))..))).))).....((((((((.((..(((((((((.(....((((..(((((......)))))..))))......).))))))((((((.....))))))....)))...)).))))))))((((((.....)))))).......((((((.((.((((((((......))))))..)).)).)))))))))).))).......((((((........)))))))))))))))))))).))...)))))).....	Unigene8775_All:78:438:+	7.61021	6.24118e-09
Pla-mir177	TCAGGGGGCAGGCACATCAGC	21	-68.2	0	119	-	CCACATCCTGTCAGGGGGCAGGCACATCAGCACCGACAAGTGATATGCCCCCCCCCCCCAAAAAAAAAAAGAAAAAAAAAAAAGAAAAAGAAAAAAAGAAGACTATTATATTGATACAGTTCAGTCAGGGAGAGGTTTTCTTTGAAGAAGAAACTGGAGGAATGCCAGGGAAGCCAGGTGAAAGTGGGGGAGGGAAAGGAATGGGGAGGGTTGGTGGGGTTAGCCCTGGGATTGGTGGCAGTGGA	((((..((.(((..(((((((.(.(((((((.((..(..((......(((.((((((.....................................((((((((((......(((((........))))).....))))))))))...................((((.((....)).))))...).))))).)))......))..)..))))))))).).)).)))))..))).)).....)))).	Unigene8996_All:1565:1809:+	9.75015	7.04302e-37
Pla-mir179-3p	TGAGCTGGCTGAGCTGGGCAG	21	-78.4	15	16	-	GGCCTGCCCCGTTCAGCCAGCCCAACCGAACAGGTTGATGCTCAACTGTATTAGCCTGTTCGGTTGAGCTGGCTGAGCTGGGCAGGCCCTGCTCG	(((((((((.(((((((((((.(((((((((((((((((((......))))))))))))))))))).))))))))))).))))))))).......	Unigene9282_All:254:348:-	0.11134	1.3703e-05
Pla-mir19a	TTGAAATAGACACCGTTGGAT	21	-39.4	1095	590	-	TTTAAAGTAGTTGAAATAGACACCGTTGGATTAAGATTAGGATTTATATAATCCAACGGTGTCTCTGTTTTAACTACTTTTAA	...((((((((((((((((((((((((((((((..((........)).))))))))))))))))..))))))))))))))...	CL16645.Contig1_All:416:498:-	-0.873949	6.7836e-34
Pla-mir19b	TTGAAATAGACACCGTTGGAT	21	-39.4	1095	590	-	TTTAAAGTAGTTGAAATAGACACCGTTGGATTAAGATTAGGATTTATATAATCCAACGGTGTCTCTGTTTTAACTACTTTTAA	...((((((((((((((((((((((((((((((..((........)).))))))))))))))))..))))))))))))))...	CL16645.Contig2_All:411:493:-	-0.873949	6.7836e-34
Pla-mir21a-3p	AGGTGACTTCATTTGGAATAA	21	-83	219	71	-	CCCACCCATTTTATTCCATATGAAGTCACCTTATACCCTGGACATCATCTGGACACCAAGTCCTTTTATTGGAAGGACAACGATCTTTTTCCTTTTTCATAAGACATTGGGAGCAAATGCTCTACTCCCCCATGCTCCCAGACACAAAAGCAGGGATGAATGAGGTAAAACCGTAAAAATGGTTTTTTAAAAAAAAAGGACCAAGGCACCAGGTGACTTCATTTGGAATAAAATGGATGGA	.(((.(((((((((((((.((((((((((((....((.(((........(((...))).((((((((...)))))))).....(((((((((((.(((((.........(((((....))))).....(((.((((............)))))))))))).)))).((((((((....)))))))).......)))))))))).))....)))))))))))).))))))))))))).))).	CL16787.Contig1_All:299:539:+	-1.60683	1.70586e-18
Pla-mir21b	AGGTGACTTCATTTGGAATAA	21	-48.1	219	71	-	CCAGAGCATCAGGTGACTTCATTTGGAATAAAATGGATGGAAATATGAAATTTCATGTAACCCTGACCATTTTATTCCATGTGAATCACCTGGTGTCCTATACACCAAATCCTGGA	..((.(((((((((((.(((((.(((((((((((((..((..((((((....))))))..))....))))))))))))).)))))))))))))))).)).....(((.....))).	CL9560.Contig2_All:785:900:+	-1.60683	1.70586e-18
Pla-mir21c-3p	AGGTGACTTCATTTGGAATAA	21	-83	219	71	-	CCCACCCATTTTATTCCATATGAAGTCACCTTATACCCTGGACATCATCTGGACACCAAGTCCTTTTATTGGAAGGACAACGATCTTTTTCCTTTTTCATAAGACATTGGGAGCAAATGCTCTACTCCCCCATGCTCCCAGACACAAAAGCAGGGATGAATGAGGTAAAACCGTAAAAATGGTTTTTTAAAAAAAAAGGACCAAGGCACCAGGTGACTTCATTTGGAATAAAATGGATGGA	.(((.(((((((((((((.((((((((((((....((.(((........(((...))).((((((((...)))))))).....(((((((((((.(((((.........(((((....))))).....(((.((((............)))))))))))).)))).((((((((....)))))))).......)))))))))).))....)))))))))))).))))))))))))).))).	Unigene9058_All:1449:1689:+	-1.60683	1.70586e-18
Pla-mir25a	TGAGGTGATGGTTTGTAATGA	21	-63.3	112	130	-	TTTGTAGCCATGAGGTGATGGTTTGTAATGAACTCATTCAGATTTGCAGCCATTTGTGCTTGATAACATAAAATCATTTCATTTTACCAAAAAACCTAAGATGATTTCATTTCTAATTTTAGTTAACAAATCAATATCAATTTGAATGAGTTCATTTTAAATTATCACCTTATGGCTTCAAAT	((((.((((((((((((((((((((.((((((((((((((((((.......((((((.............((((.(..((((((((..........))))))))..).)))).............)))))).......)))))))))))))))))).)))))))))))))))))))).)))).	CL17442.Contig1_All:104:286:+	0.233211	0.210137
Pla-mir25b	TGAGGTGATGGTTTGTAATGA	21	-50	112	130	-	TTTGTAGTCATGAGGTGATGGTTTGTAATGAATTCATTCAAATTTATACTGTTTTATTCACTACAATTAGAAATTAAGTCATCTTATATTTTTCTATAAAATGAAATGACTTGTGTTATCAAGCACAAATTGTTGCAAATATGAATGAGTTTATTACAATTCATCATGTCGCTATAAAA	((((((((...((.(((((((.((((((((((((((((((..............((((..(.((((((........((((((.((((.(((......))))))).))))))((((((....)))))))))))).)..)))))))))))))))))))))).))))))).)))))))))).	Unigene49175_All:5:183:+	0.233211	0.210137
Pla-mir29-3p	TGGAGCTTTAAGATGAACGGA	21	-28.2	22	0	-	TCTTACAGTCCATGTTCGTGGGCTTCTCGTCATCTACGGGGTCCATTTTCACATCCCATTATGTGTTGGGCTGGAGCTTTAAGATGAACGGACAAGCTGAAG	......(((((((....)))))))((.((((((((..(((.(((((((.(((((......)))))..))).)))).)))..))))).)))))..........	CL264.Contig10_All:30:131:-	-7.29655	2.75505e-07
Pla-mir3	TGACATCAGGGCCGACACATC	21	-48.4	41	0	-	AAAATAAGAATGACATCAGGGCCGACACATCAGTGCCAAAAAGTGAAAAGCATCCCCCACAAAGTGTATTTCACTTTTTCTGTGCTAATGTGCCAACCCTGATGTCATTCCAACTAA	.......((((((((((((((..(.(((((.(((((.(((((((((((.((((..........)))).)))))))))))..))))).))))).)..)))))))))))))).......	CL11307.Contig1_All:911:1027:-	-8.19471	5.92148e-13
Pla-mir30a	TTCTCACAAGATTCGTTCTCA	21	-81.3	169	174	-	TCGGATTAGGCGCAAATGAATTTCGTGAGAACCGTGCAAACGGCATCAGAGAAACTGATGCATTAGTACCGAAAAGTGATTTACACTTTTTAGGGGGCACTTATCACTTTTCGGCGCTGAAGTGTCTGTACCCTGATGTCGTTTTCACAGTTCTCACAAGATTCGTTCTCACCTAATTTTT	..((((((((.(..(((((((((.((((((((.(((.((((((((((((.(..((.(((((.(((((.((((((((((((.....((((....)))).....)))))))))))).))))).))))).))..))))))))))))).))).)))))))).)))))))))..).))))))))..	CL264.Contig1_All:2027:2207:-	0.0602697	0.69908
Pla-mir30b	TTCTCACAAGATTCGTTCTCA	21	-81.3	169	174	-	TCGGATTAGGCGCAAATGAATTTCGTGAGAACCGTGCAAACGGCATCAGAGAAACTGATGCATTAGTACCGAAAAGTGATTTACACTTTTTAGGGGGCACTTATCACTTTTCGGCGCTGAAGTGTCTGTACCCTGATGTCGTTTTCACAGTTCTCACAAGATTCGTTCTCACCTAATTTTT	..((((((((.(..(((((((((.((((((((.(((.((((((((((((.(..((.(((((.(((((.((((((((((((.....((((....)))).....)))))))))))).))))).))))).))..))))))))))))).))).)))))))).)))))))))..).))))))))..	CL264.Contig2_All:227:407:-	0.0602697	0.69908
Pla-mir30c	TTCTCACAAGATTCGTTCTCA	21	-81.3	169	174	-	TCGGATTAGGCGCAAATGAATTTCGTGAGAACCGTGCAAACGGCATCAGAGAAACTGATGCATTAGTACCGAAAAGTGATTTACACTTTTTAGGGGGCACTTATCACTTTTCGGCGCTGAAGTGTCTGTACCCTGATGTCGTTTTCACAGTTCTCACAAGATTCGTTCTCACCTAATTTTT	..((((((((.(..(((((((((.((((((((.(((.((((((((((((.(..((.(((((.(((((.((((((((((((.....((((....)))).....)))))))))))).))))).))))).))..))))))))))))).))).)))))))).)))))))))..).))))))))..	CL264.Contig3_All:347:527:-	0.0602697	0.69908
Pla-mir30d	TTCTCACAAGATTCGTTCTCA	21	-81.3	169	174	-	TCGGATTAGGCGCAAATGAATTTCGTGAGAACCGTGCAAACGGCATCAGAGAAACTGATGCATTAGTACCGAAAAGTGATTTACACTTTTTAGGGGGCACTTATCACTTTTCGGCGCTGAAGTGTCTGTACCCTGATGTCGTTTTCACAGTTCTCACAAGATTCGTTCTCACCTAATTTTT	..((((((((.(..(((((((((.((((((((.(((.((((((((((((.(..((.(((((.(((((.((((((((((((.....((((....)))).....)))))))))))).))))).))))).))..))))))))))))).))).)))))))).)))))))))..).))))))))..	CL264.Contig4_All:2168:2348:-	0.0602697	0.69908
Pla-mir30e	TTCTCACAAGATTCGTTCTCA	21	-48.8	169	174	-	GTTCTCACAAGATTCGTTCTCACTTAATTTTTAGTGAAAATTATATGCCTGCTGAAAGGTCTATTGTCCGTCCGAAACTATTGAAGACATCATTGTTCATATGGATTCAAAGGTAGTGGTAGAGATTATCAATAATGCATGTCAATGCCCACGGTGAGTGATGAGCTTGTGAGAAG	.((((((((((.((((((((((((((((((((...))))))))...((((......))))((((((.((....(((.((((((((.(......).)))).)))).)))...)))))))).................((((....))))....)))))).)))))))))))))))).	Unigene42912_All:1:176:+	0.0602697	0.69908
Pla-mir31	CATCGGTGACGGACACAATACT	22	-96.1	44560	41186	TCTTGTGTCCAACACCGACGTC	GAACGTCTTTTGCATCGGTGACGGACACAATACTTTTTTCCTTCTCTTTGTCTCTCTGACTACCCATCAAGGCCAAAGACCGTTCACTAGGTGGGTGGGTCATCGGACTAGAGGGGTCAGGGTGCGCATCCACGACAGCCCGCCGATTAAACTGTTGGTGGGGCTCCCTCCACTCGAGATAAAAGAAGATTGAGAGAAGTCTTGTGTCCAACACCGACGTCAAAGACTATT	....((((((.((.((((((..((((((((.((((((((((((((.((((((((((((((((((((((.((...............)).)))))))))....)))))...((((((((.((((....))))..)))(((((((((((......)))))).)))))))))).....)))))))))))))...))))))))).))))))))..)))))).)).))))))....	CL2704.Contig1_All:72:302:+	-0.0954002	3.76087e-22
Pla-mir36	TGAGTTTCTCAAGGCATTTGT	21	-78.2	15	0	-	TAATTTCATTTGAGTTTCTCAAGGCATTTGTAGCCATGAGATGATAGTTTCCTAACGAACTCATTCAAATTTATACTGATCTGTTAACTACAATTAGAAATGAAGCCATCTTAGGTTTTTCTGTTAAATGAAATGACTTATGTTATCAAACACAAGGTGCTGCTAATCTGAATGAGTTTGTTACAAACCATCCCGTTGTGGCTACAAAAGCCTTTGGAAATTCAAACGAAATGA	..(((((.(((((((((((.(((((.(((((((((((((...(((.((((..(((((((((((((((.(((....(((((.(((.....))))))))......(((((((((..(((((((........)))(((((....))))).))))..))))))..)))))).))))))))))))))).)))).)))...))))))))))))).))))).))))))))))).)))))..	CL391.Contig1_All:101:334:-	-6.74403	3.37466e-05
Pla-mir37-3p	ATAAGAGGGATGTATGAGGGTTT	23	-62.7	21	36	-	AAGTGTCTTGAATTCAACCCGAATATAGCCCGTTTGTGCGAACCAAAGAGCGACATGGTACAACCTATTTTTTCCATAATTTTGAGCTATTTTGTGATCCGATTCAGGCCCACTGACCCTGAACCGGTTTTGGGGGTATTTTAGGGGTTTAGCCCGTTTTGGGTTTAGGGTTTCTTGGGATGCATGTTGTGATATAAGAGGGATGTATGAGGGTTTTAGGGAATGC	.....(((((((....((((..(((((.(((.((((((...........((((((((.................(((((..(......)..)))))..((......))((((..(((((((((((.(.....(((.((...........)).)))....).)))))))))))...))))...))))))))..)))))).))).)))))..))))))))))).....	CL422.Contig2_All:1467:1692:+	0.795759	0.0427787
Pla-mir38	GGGGACATCATATGGAATAAA	21	-32.5	15	41	-	CAGGACACCTGGGGACATCATATGGAATAAAATGCATATTCTATATTCAGAAGATACATCACCTACCCATTTTATTCAATATGATGTTCCCTGATGCCCA	..((.((.(.(((((((((((((.((((((((((....((((......))))...............)))))))))).))))))))))))).).))))..	CL4699.Contig1_All:5:104:-	1.46883	0.000385256
Pla-mir39	TTCCCTAACCCCCCCATGCCGA	22	-42.4	1421	1826	GGAATGGGAAGGTAGGGAAAA	GAAAGCTACTGGAAGTTGTAGGAATGGGAAGGTAGGGAAAAGGGGTAAGAGCCAATTTTCCCTAACCCCCCCATGCCGATGATTTCCTGCGGTTCCTCC	...((((.(.(((((((((.((.(((((..(((((((((((..(((....)))..)))))))).)))..))))).)).))))))))).).)))).....	CL6191.Contig2_All:25:123:+	0.379975	7.7558e-14
Pla-mir40a	CGACGTCGCACAAAGAGGGTC	21	-56.7	83	211	-	ACGACGTCGCACAAAGAGGGTCGGTGTAGGTGATGTGAACCGCATTCAAACGCATTTGTTTTAGACATCTCCTGATACGGAACATGAAAGATGAAGCAGGGAAAGTTGTGATTCACCTTCAACCAACTCGTCTCGCCTTTGCTTTGTTTTAGAACCTCGAATAAACGTTGTTGAGGCACCTGTAGCTTCGGAACAGACCCGATCCTTGTTGCTGTGGATTTGTA	((((..((((((((.(((((((((.((..((((((((...))))))........(((((.((((.......)))).)))))......(((((((((((((((.((((((((.......)))..)))))..)))).....)))))))))))....((((.(((((...)))))))))...(((......))).))..))))))))))).))).)))))..)))).	CL6284.Contig4_All:1:224:+	1.36425	1.55973e-14
Pla-mir40b	CGACGTCGCACAAAGAGGGTC	21	-56.7	83	211	-	ACGACGTCGCACAAAGAGGGTCGGTGTAGGTGATGTGAACCGCATTCAAACGCATTTGTTTTAGACATCTCCTGATACGGAACATGAAAGATGAAGCAGGGAAAGTTGTGATTCACCTTCAACCAACTCGTCTCGCCTTTGCTTTGTTTTAGAACCTCGAATAAACGTTGTTGAGGCACCTGTAGCTTCGGAACAGACCCGATCCTTGTTGCTGTGGATTTGTA	((((..((((((((.(((((((((.((..((((((((...))))))........(((((.((((.......)))).)))))......(((((((((((((((.((((((((.......)))..)))))..)))).....)))))))))))....((((.(((((...)))))))))...(((......))).))..))))))))))).))).)))))..)))).	CL6284.Contig5_All:1:224:+	1.36425	1.55973e-14
Pla-mir42	CCCTGTCGGGGAGCGGGCATA	21	-59.1	60	127	TGCCCACCCCTTGACAAGGAG	TCTCTCCGCACCCTGTCGGGGAGCGGGCATATCAGCACAGACAAGTGATATCATTTGTCGGCGTTGATATGCCCACCCCTTGACAAGGAGCATGGAGGGGT	(((((((((.((.((((((((.(.((((((((((((.(.((((((((....)))))))).).)))))))))))).).)))))))).)).))..))))))).	CL687.Contig2_All:75:175:+	1.09999	5.05773e-07
Pla-mir43a	TGTTCTGTCCAGGATTTGGTG	21	-106.3	45	84	-	AGGGTAAGGATGTTCTGTCCAGGATTTGGTGTATAGGATAGTGTCCAGGACACCATGGACATCATATGGAATAAAATGGGTGGGTGATAGCATTTTTTGAACGTGGAGTATGCATTTTATTCCGTAAATGCTCCTGGTGTCCTGGGCACCATCCTAGACACCAAATCCTGGACAGAAAACTCTTTCCAACCTTC	((((((((((..((((((((((((((((((((.((((((.(((((((((((((((.((((((..((((((((((((((.(((........((.....)).........))).)))))))))))))).))).)))))))))))))))))).)))))).))))))))))))))))))))...)))))...))))).	CL7025.Contig1_All:632:825:-	0.918654	0.000437643
Pla-mir43b	TGTTCTGTCCAGGATTTGGTG	21	-106.3	45	84	-	AGGGTAAGGATGTTCTGTCCAGGATTTGGTGTATAGGATAGTGTCCAGGACACCATGGACATCATATGGAATAAAATGGGTGGGTGATAGCATTTTTTGAACGTGGAGTATGCATTTTATTCCGTAAATGCTCCTGGTGTCCTGGGCACCATCCTAGACACCAAATCCTGGACAGAAAACTCTTTCCAACCTTC	((((((((((..((((((((((((((((((((.((((((.(((((((((((((((.((((((..((((((((((((((.(((........((.....)).........))).)))))))))))))).))).)))))))))))))))))).)))))).))))))))))))))))))))...)))))...))))).	CL7025.Contig2_All:632:825:-	0.918654	0.000437643
Pla-mir45-3p	TCTCCTGCTCGTAAGACCGTT	21	-33.2	31	22	-	AAGGATGTAAAGAGTGTTTTTGGGCGTGGGGGGAAGGGGTTTTACCTTCTGTTCAATCCGGAATTCGGATCCTCTCCTGCTCGTAAGACCGTTTTGCGACAGC	.....(((((((.(.(((((((((((.(((((((((((......))))........((((.....))))))))))).)))))).)))))).))))))).....	CL7975.Contig2_All:259:361:-	-0.476571	0.238313
Pla-mir46	TGGTTTGGTCCAGGAAGTAGG	21	-85.6	732	1095	-	TAAATCTTGATTCCGCTGATCCACAATTTGTGGGAATTTGTGGCATTGGCGGAATTGGAAAGACAACTATGGCAAGGAGTGTCTACAACCAAATCTTTGCAAGCTTCAACGGCAGTAGCTTTCTTAGAGATATTAGAGAAGAAGCTTTAAATTACAAGGGCCTAATTCGTTTGCAGAATCAACTTCTAGAGGATATATTAGGAAAACAAAACTATAATATAATCCATGTTGATAGAGGATCAAAATTGATAGAAAAAAGACTTCAAGAAAGAAAAGTACTTCTAATACTCGATGACGTGAATCACGAATTGCAGCTAAATGCATTGGCTGGGAAGGTCAGTTGGTTTGGTCCAGGAAGTAGGATTATCATAA	....((((((((((((((((((((((.((.....)).)))))).)))))))))))((......))......(((((((.((........))..)))))))(((((((...(((....)))(((((.((....)).)))))))))))).......))))).((((.(((.(..((.(((((((((......((((((((((..............)))))).))))...(((((.....)))))..((((.((........)))))).........(..(((((......((((..((((...)))).))))(((((((.....))))))))))))..)))))))))).))..).))).))))..........	CL8199.Contig1_All:127:498:-	0.599211	1.5374e-18
Pla-mir48	CAGGGTGCAGAGAGGAGCAGA	21	-42.7	70	98	-	GATTATATCCTCGTCTTATCCTCTGCACCCTGTCAATTCAGGGGAGGGCACATCCCCCTAACAGGGTGCAGAGAGGAGCAGAGGATCGGATA	......((((((..(((...(((((((((((((.......(((((.......)))))...)))))))))))))..)))..))))))......	CL8287.Contig3_All:60:151:+	0.50363	0.025113
Pla-mir4a	TTCTAAACTATGCATTCTCTT	21	-44	14	13	-	TTTGGTAACCTTCTAAACTATGCATTCTCTTCTTTTTTTTTCCATTTTGTTTTCCCTTGTAAAGAATAAGAAAAAGAGGAGAATACATTCTTTAGAAGGTTACCAAC	.((((((((((((((((..(((.(((((((((((((((((...(((((..............)))))))))))))))))))))).)))..)))))))))))))))).	CL11352.Contig1_All:226:332:-	-0.088617	0.877019
Pla-mir4b	TTCTAAACTATGCATTCTCTT	21	-44	14	13	-	TTTGGTAACCTTCTAAACTATGCATTCTCTTCTTTTTTTTTCCATTTTGTTTTCCCTTGTAAAGAATAAGAAAAAGAGGAGAATACATTCTTTAGAAGGTTACCAAC	.((((((((((((((((..(((.(((((((((((((((((...(((((..............)))))))))))))))))))))).)))..)))))))))))))))).	CL11352.Contig2_All:145:251:-	-0.088617	0.877019
Pla-mir50a	CAGGGGATGTCATATGGAATA	21	-67.7	25	20	-	TCCAGGACACCAGGGGATGTCATATGGAATAAAATGGGCGGGAATTTGAAATTTCATCTAACCCCTGCCCATTTTATTCCATGTGAAGTCACCCGGTGTCCTGGC	.((((((((((.((((((.(((((((((((((((((((((((....(((....))).......))))))))))))))))))))))).))).))))))))))))).	CL8383.Contig1_All:1852:1956:+	-0.303772	0.487933
Pla-mir50b	CAGGGGATGTCATATGGAATA	21	-67.7	25	20	-	TCCAGGACACCAGGGGATGTCATATGGAATAAAATGGGCGGGAATTTGAAATTTCATCTAACCCCTGCCCATTTTATTCCATGTGAAGTCACCCGGTGTCCTGGC	.((((((((((.((((((.(((((((((((((((((((((((....(((....))).......))))))))))))))))))))))).))).))))))))))))).	CL8383.Contig2_All:1852:1956:+	-0.303772	0.487933
Pla-mir50c	CAGGGGATGTCATATGGAATA	21	-40.8	25	20	-	TCCAGAACATCAGGGGATGTCATATGGAATAAAACAAGCGAGAATCTGAAATTCATCTAACCCCTTCCCATTATATTCCATGTGAAGTCCTCTGGTGTCCTGGAT	(((((.((((((((((((.((((((((((((........(((.....((......))......))).......)))))))))))).)))))))))))).))))).	Unigene49316_All:123:227:-	-0.303772	0.487933
Pla-mir52a	TCAGGGGCCAACACATCAGCA	21	-54.9	15	11	-	CAGCCCAGCATCAGGGGCCAACACATCAGCACTGAAAAAGTGATTTAAACTTTTTGGGGAATGCTTTTCACTTTTTGGCGCTGCTGTGTCAGCCCCTGATGCCTGGTTGA	(((((..(((((((((((..(((((.((((.((.(((((((((........................))))))))))).)))).)))))..)))))))))))..))))).	CL846.Contig1_All:754:863:-	-0.42933	0.461916
Pla-mir52b	TCAGGGGCCAACACATCAGCA	21	-55.3	15	11	-	CAGCCCACCATCAGGGGCCAACACATCAGCACATCAGCACCCCAAAGGATGCTTTTGATGTGTTGGCCCCTGTTGCTGGGCTGA	(((((((.((.((((((((((((((((((......((((.((....)).)))).)))))))))))))))))).)).))))))).	Unigene44007_All:48:131:-	-0.42933	0.461916
Pla-mir52c	TCAGGGGCCAACACATCAGCA	21	-46.4	15	11	-	CAGCCCACCATCAGGGGCCAACACATCAGCACAGAAAAGTGAAAAGCATCCCCAAAAAAATGTATATCACGTTTTTGGAGCTGATATGTTGGCCCCTAATGTCAGTCTGA	(((.(...(((.(((((((((((.((((((.((((((.((((...((((..........))))...)))).))))))..)))))).))))))))))).)))...).))).	Unigene61970_All:13:122:+	-0.42933	0.461916
Pla-mir53a-3p	TGAGAACTATGCAAACGGCAC	21	-73.7	27	0	-	TGCACCCTGGTGCCATTTTCACGGTTCTCATGAAATTCTCTCACCTAATAATTTCCTTGGTTTGGGATTAGGTACAAACCCTCCATGAATGAACAAGGTCCGAATGGTGTCAAAACCAGACATGTAAGTTCCAAAAAAGGGGTTTGGATTATGTGAAAATGAATTTCGTGAGAACTATGCAAACGGCACCAGAGGGGCT	.((.((((((((((.(((.((.((((((((((((((((..((((...((((((((((......)))).......((((((((....((((..(((..(((....((((......))))))).)))..)))).......))))))))))))))))))....)))))))))))))))).)).))).)))))))).)).)).	CL8981.Contig1_All:22:220:+	-7.59201	8.88444e-09
Pla-mir53b-3p	TGAGAACTATGCAAACGGCAC	21	-74.5	27	0	-	TGGCCCTGATGTGTCTTCACCCTGGTGTCATTTTCACGGTTCTCATGAAATTCTCTCACCTAATAATTTCCTTGGTTTGGGATTAGGTACAAACCCTCCATGAATGAACAAGGTCCGAATGGTGTCAAAACCAGACATGTAAGTTCCAAAAAAGGGGTTTGGATTATGTGAAAATGAATTTCGTGAGAACTATGCAAACGGCACCAGAGGGGCT	.((((((...(((....))).((((((((.(((.((.((((((((((((((((..((((...((((((((((......)))).......((((((((....((((..(((..(((....((((......))))))).)))..)))).......))))))))))))))))))....)))))))))))))))).)).))).)))))))).))))))	CL8981.Contig2_All:110:323:-	-7.59201	8.88444e-09
Pla-mir55-3p	TAGGACACCAGGTGATTTCAT	21	-103.7	9	58	-	CTTGCCCATTTTATTGCATGTAAGTCCCCTGGTTTCCTGGACACTAAATTGTGGACAGAACATTTATTTTGTTTTCTTAATTTGGGAGCAAATGTTTTGTGAACAAAATGAGTGTGACATCATGGGCTGGCACGTGGTGTAAATGGGTTGAAAGCATAAAAAATGTTAAATTCAAATTGAAGGAGATTAAAAAAGAGAGACCAAATTTAAAAGAGAAATGATCTTTCACACCCAAATTTGTCTGTCCCCATGTCCCCACACAACAGACTGACATAATGTTTTATGTAAACAAGCAAATTTCCTGTGCAGGATTTGGTGTCTAGGACACCAGGTGATTTCATTTGGTGTAAA	.(((((((.........(((.(((((.((((((.((((((((((((((((.((.((((.(((((((((((((((.(...(((((....))))).....).))))))))))))))).((((((((........))))))))...((((((((((((((.....)))))...)))))...................((((((.((..(((.....)))..)).))))))...)))).....((((((.....(((......)))))))))..((((((....))))))...............)))).)).)))))))))))))))).)))))).)))))))).))).)))).	CL9560.Contig1_All:403:753:-	2.70635	2.84578e-10
Pla-mir57a-3p	TCACTTTTCGGCGCTGATGTG	21	-29.3	5	15	-	AGGGGGCCCCGACACATCAACACATCAGCACCAGGGGGATGCTTCTCACTTTTCGGCGCTGATGTGTGTGCACCCT	.((((((............((((((((((.(((((((((....)))).)))...)).))))))))))..)).))))	Unigene10196_All:535:610:+	1.60315	0.0247064
Pla-mir57b-3p	TCACTTTTCGGCGCTGATGTG	21	-40.8	5	15	-	GGGGGCTGATGCATCAGCACAGAAAAGTGATTTTACATCTTTTGGGGGGGTGCTTATCACTTTTCGGCGCTGATGTGTCCGCACCAT	..((((.(((((((((((.(.((((((((((....(((((((...)))))))...)))))))))).).))))))))))).)).))..	CL3185.Contig5_All:551:637:-	1.60315	0.0247064
Pla-mir58	TTTGGTGTCTAGGATGGTGTC	21	-83.7	68	110	-	CTGTCCCGGATTTGGTGTCTAGGATGGTGTCTAGTACACCAGGGGCCGTCGGATTTCAAAAATGCATGTTCCATATTTCAAAAATGCATCACCCACCCAGTTTATTCTATATGACGTCCCTTGGTGTTCAGGACACCATCCTAGACATTAAATCCTGGACAGA	((((((.(((((((((((((((((((((((((...((((((((((.(((((..........((((((................)))))).........((......))...))))).))))))))))...))))))))))))))))))))))))).)))))).	Unigene10401_All:214:376:+	0.712092	0.00120991
Pla-mir59	TGGCTTCAGGAGACGTACACA	21	-36.2	76	54	-	AATAATATTGTGGCTTCAGGAGACGTACACATATTCTTAAAAAACTGTATATCACTAGTTTTTTGGGTATTATACTTTCCTGAAGCCCACAAGATTATTT	((((((.((((((((((((((((.(((........((((((((((((........)))))))))))).....))))))))))))).)))))).)))))).	Unigene10491_All:56:155:-	-0.474861	0.0638347
Pla-mir65-3p	CATCAGGGGGTGGCGTAGACG	21	-78.6	21	0	-	TTGGTCTGAAATCCTCTGCGCCACACCCCCTGATGGAACACTCAGGAGGAGGAATCAAAAACCTCAAAAAAGTGAATTGATTCCCCCGCCCCCGAGTGTCCCATCAGGGGGTGGCGTAGACGATTTCAGCCA	.(((.((((((((.((((((((..((((((((((((.((((((.((.((.((((((((..((.........))...)))))))).)).))...)))))).)))))))))))))))))))).)))))))))))	Unigene18272_All:668:799:-	-7.22949	5.47558e-07
Pla-mir66-3p	GGGCTTCTCTCCTAGGCAGG	20	-51.5	45	53	GGGCTTCTCTCCTAGGCAGG	AGAAGTCGTAGGGCTTCTCTCCTAGGCAGGTGATGGTGATAGATGATGGTTTATCTGCGTTTGCTTTCAATGACCTGCCAAAGGAGAGCTGCCCTGTGACTGCTT	((.(((((((((((..(((((((.(((((((.((((((((((((((....)))))))...)))))....)).)))))))..)))))))..))))))))))).)).	Unigene18649_All:43:147:+	0.254244	5.48531e-07
Pla-mir67a-3p	TATTTCATATGACGTCCCCTG	21	-28.1	35	63	-	GGTGTCTAGGACACCAGAGGCTATCATATGGAATAAAATGCATCACCCACCGGTTTTATTTCATATGACGTCCCCTGTCATGGATAC	.(((((((.((((...(.(((..((((((((((((((((.............)))))))))))))))).))).).)))).)))))))	Unigene18777_All:14:100:+	0.866186	0.00381025
Pla-mir67b-3p	TATTTCATATGACGTCCCCTG	21	-52.8	35	63	-	CCAGCAGTCCAGGGGACGTCATATTGAATAAGAGAAAGGTTGTCTTGTCCACGATGTACCTTCACCCTTAACAGGAGGCACACTGGGAATTTGAAATTTCATCCAACACCTATTTTATTTCATATGACGTCCCCTGGTGTAGCCGA	...((...((((((((((((((((.((((((((.....((((((...(((.((.(((.(((((..........))))).))).)))))....)).........)))).....)))))))).))))))))))))))))....))...	Unigene33907_All:43:188:+	0.866186	0.00381025
Pla-mir68-3p	TTATGGTCCCGTCTCCAACTT	21	-37.1	106	103	ATTGGATTCGGGATCATGATG	GTGCTCCAAGCTATTGGATTCGGGATCATGATGTCAGTTGCATGCAAATGACCTTATGGTCCCGTCTCCAACTTCATGGAGATC	...(((((.(...(((((..(((((((((((.((((.(((....))).)))).)))))))))))..)))))...).)))))...	Unigene19232_All:5:88:+	-0.0232317	0.908086
Pla-mir69	TTGTAGCAGAAGTCCGTGTAG	21	-67.1	16	9	-	TAGGGACCCTTTGTAGCAGAAGTCCGTGTAGTGATCATACCAAGGGCTAATAAACGTGTTGCGTTTATAATTGAATTTGATGCCTTTTTGGGTGTCTTTTTTTTATTTTTTATTGGGTGCCTTTTTGACACTTTCAACCCTATAAACCTTACATGTCAGTCCATGATGATTGGTACACGGGCTTCCGCTTCAGAAGATCCTGA	..((((.(.((((.(((.((((((((((((.(((((((..((.(((((.....((((((...(((((((.(((((...(((((((....)))))))...................((((.(.....).)))))))))...)))))))...)))))).))))).))))))))).)))))))))))).))).)))).).))))..	Unigene19605_All:204:406:+	-0.811936	0.178842
Pla-mir6a-3p	TCAATGCTGATGTGAGTGATC	21	-52	26	52	ACACTCATTTCAGCATTGAAA	CAGGGGCTGAGAACACTCATTTCAGCATTGAAAAGTGATTTGCATTTTTTGGGGTGCGTGCTTATCACTTTTCAATGCTGATGTGAGTGATCACATGTCTCT	.((((((((.((.(((((((.((((((((((((((((((..((((.(........).))))..)))))))))))))))))).))))))).)).)).))))))	CL11621.Contig3_All:2140:2241:-	1.01817	0.00265403
Pla-mir6b-3p	TCAATGCTGATGTGAGTGATC	21	-54.7	26	52	ACACTCATTTCAGCATTGAAA	CGGGGGCTGAGAACACTCATTTCAGCATTGAAAAGTGATTTGCATTTTTTGGGGTGCGTGCTTATCACTTTTCAATGCTGATGTGAGTGATCACATGCCTCT	.((((((((.((.(((((((.((((((((((((((((((..((((.(........).))))..)))))))))))))))))).))))))).)).)).))))))	Unigene29638_All:86:187:+	1.01817	0.00265403
Pla-mir6c-3p	TCAATGCTGATGTGAGTGATC	21	-52	26	52	-	CGGGGGCTGAGAACACTCGTATCAGCATTGAAAAGTGACTTGCATTTTTTGGGGCACGTGCTTATCACTTTTCAATGCTGATGTGAGTGATCACATGCCTCT	.((((((((.((.(((((((((((((((((((((((((...((((............))))...))))))))))))))))))))))))).)).)).))))))	Unigene48188_All:150:251:+	1.01817	0.00265403
Pla-mir6d-3p	TCAATGCTGATGTGAGTGATC	21	-54.7	26	52	ACACTCATTTCAGCATTGAAA	CAGGGGCTGAGAACACTCATTTCAGCATTGAAAAGTGATTTGCATTTTTTGGGGTGCGTGCTTATCACTTTTCAATGCTGATGTGAGTGATCACATGCCTCT	.((((((((.((.(((((((.((((((((((((((((((..((((.(........).))))..)))))))))))))))))).))))))).)).)).))))))	Unigene9224_All:86:187:+	1.01817	0.00265403
Pla-mir71-3p	TTTGTTCATGCAGTACGCTCA	21	-37.8	34	39	-	ACTCAAGCACTTGAGCATACTGCATGTACAAAAACCCATTTTTGTTCATGCAGTACGCTCAAGTAATTGAG	.(((((..((((((((.(((((((((.(((((((....))))))).))))))))).))))))))..)))))	Unigene19801_All:390:460:+	0.216153	0.525297
Pla-mir73a	CATTGTCTGACACTTGGGTAG	21	-35	23	22	-	AAGTACAGGGCATTGTCTGACACTTGGGTAGAAAAAGTGAACCACCATCATCAGTGTTTTTCCCTTTTCCACCCACGTATCACCCAATGCTCTTTGCTTC	(((((.(((((((((..(((.((.(((((.(((((.(.(((.(((........)))...)))).))))).))))).)).)))..))))))))).))))).	Unigene21507_All:84:183:+	-0.0459283	0.917032
Pla-mir73b	CATTGTCTGACACTTGGGTAG	21	-35	23	22	-	AAGTACAGGGCATTGTCTGACACTTGGGTAGAAAAAGTGAACCACCATCATCAGTGTTTTTCCCTTTTCCACCCACGTATCACCCAATGCTCTTTGCTTC	(((((.(((((((((..(((.((.(((((.(((((.(.(((.(((........)))...)))).))))).))))).)).)))..))))))))).))))).	Unigene48286_All:84:183:+	-0.0459283	0.917032
Pla-mir75	TGCATCAGGGGCGGACAGATC	21	-75.9	609	687	-	AGGTCTGCCCTGCATCAGGGGCGGACAGATCAGCGCTAGGAGAGTGTTTTACACTATTTCGGGGGATGCTTGTCACTTTTTGGCACTGATGTGTTTGCCCCTGATGCAGGGCAGAGCTT	((.((((((((((((((((((((((((.(((((.(((((.((((((.....((((........)).)).....))))))))))).))))).)))))))))))))))))))))))).)).	Unigene21670_All:149:267:-	0.192061	0.0166918
Pla-mir78a	CAGAGGAGTGGCACCTGAGAACA	23	-57.7	600	6222	-	GAGCATACCCCAGAGGAGTGGCACCTGAGAACACAGGTGGTTCTGCCGCTACAAATTGGCTTTTATGCACTTGTGTTCTCAGGTCACCCCTTTGGGGCACACTGTTCA	(((((..(((((((((.(((..(((((((((((((((((.....((((........)))).......)))))))))))))))))))).))))))))).....))))).	Unigene22668_All:595:702:-	3.39254	0
Pla-mir78b	CAGAGGAGTGGCACCTGAGAACA	23	-57.7	600	6222	-	GAGCATACCCCAGAGGAGTGGCACCTGAGAACACAGGTGGTTCTGCCGCTACAAATTGGCTTTTATGCACTTGTGTTCTCAGGTCACCCCTTTGGGGCACACTGTTCA	(((((..(((((((((.(((..(((((((((((((((((.....((((........)))).......)))))))))))))))))))).))))))))).....))))).	Unigene47015_All:57:164:+	3.39254	0
Pla-mir78c	CAGAGGAGTGGCACCTGAGAACA	23	-57.7	600	6222	-	GAGCATACCCCAGAGGAGTGGCACCTGAGAACACAGGTGGTTCTGCCGCTACAAATTGGCTTTTATGCACTTGTGTTCTCAGGTCACCCCTTTGGGGCACACTGTTCA	(((((..(((((((((.(((..(((((((((((((((((.....((((........)))).......)))))))))))))))))))).))))))))).....))))).	Unigene47015_All:752:859:-	3.39254	0
Pla-mir79a	TTTGTTGATTGTCATCTAATC	21	-35.1	876	477	-	TATGAACATGTTTGTTGATTGTCATCTAATCATCGCTCTTTCTTAATGTTGCATATCTCATGAAATTATGGTTAGATGACCATCAACAAACACATTCGTGA	((((((..(((((((((((.(((((((((((((.....((((...................))))..))))))))))))).)))))))))))..)))))).	Unigene2538_All:44:144:+	-0.858749	1.09323e-26
Pla-mir79b	TTTGTTGATTGTCATCTAATC	21	-35.1	876	477	-	TATGAACATGTTTGTTGATTGTCATCTAATCATCGCTCTTTCTTAATGTTGCATATCTCATGAAATTATGGTTAGATGACCATCAACAAACACATTCGTGA	((((((..(((((((((((.(((((((((((((.....((((...................))))..))))))))))))).)))))))))))..)))))).	Unigene32163_All:44:144:+	-0.858749	1.09323e-26
Pla-mir81	CAGACAGTGGGAATAAGGCAA	21	-65.2	14	27	-	GTGGACTGTGCAGACAGTGGGAATAAGGCAATCACAATGCTTAGGCCACCTCACCTCTTTGATGCATGTTTCATGGATATCCAGATGCCAGAAATGGATGGGTTTGAAGCTACAAGAAGGATTCGGGCTATGGAATATGACATCAATGACCGTATTCGACATGGGGAATTGTCTGTGGAAGCTTATGGAAATGTTTTGAACTGGCATGTGCCTATATTTGCCATGACTGCAGATGTGATCCAG	.((((((.(((((...((((((((((((((..............((((..(((..((.(((((((((((((((((..((((((...........)))))).(((((((.((.......)).)))))))))))))))))).)))))).))(((((..(..((((((......))))))...)..)))))........)))..))))...))))).))))).))))..))))).)...).)))).	Unigene26770_All:357:599:+	0.96578	0.0394847
Pla-mir83-3p	CACAAGGGGACGTCGCAGAGG	21	-71.1	120	103	-	TTTTCGGTGCTGATGTGTCTGCTCCTGTGTGCACGATTTTTGTCCACACACATCACGTGTCAGTCATGTCACACATGGTCACTAAGCGTTTTTCATTCCAAAACCCCCTCTCCGAACTGAAATCGTCTACTGCTCTAAATAACAATAGTCTAAATGGGTCTATCACAAATATCAAATTTTGGTTACTTTTGGTGGTTTGTCGCCCGTTTGTATTCTCTAATTTTCTTATTTGTTTTCTAATCGATTTTTATGCTTGAAAAGATAAGTGTCACAAAAGTGACTTGCCTCACAGGGCGTCGCACAAGGGGACGTCGCAGAGGATATCGTGTC	....(((((((..((((.(..(((((.(((((((((((.((((....((((.....))))...((((((...)))))).((.((.(((..((((((((...............))).))))).))).)).)).........)))).))))(((((((((.....((((((((((((...........)))))).)))))).)))))))))..............((((((..(((((..................))))))))))).(((((....)))))..((((....)))))).))))))))))..).))))..)).)))))....	Unigene29130_All:851:1180:-	-0.202194	0.297622
Pla-mir86-3p	TTCACGTCGCAGAGGATATCA	21	-122.4	30	58	-	ATTAGTGGGTTGATATCCTCTGCGACATAAATATTTATCCAGGCTGGAGCCACCATTCATGGGCCTCCATGTGGTGTCAGTGTCAGTACTTGACATCACATGGAGCCTCATGAATGGTGGCTCCATGCCCGGAGTAAGTATTCACGTCGCAGAGGATATCATCCCGCTATT	..(((((((.((((((((((((((((...(((((((((((.((((((((((((((((((((((.((((((((((((((((((....))).))))))))))))))).))))))))))))))))))).))).))).))))))))...)))))))))))))))).)))))))..	Unigene33326_All:247:417:+	0.969291	0.00229102
Pla-mir88-3p	TTTTCAGCGCTGATGTGTCCG	21	-35.8	18	0	-	ACCGAGGGGATGATGTATCAGTGCCGAAAAGTGACTTACACTTTTTGGAGGGCGCTTATCACTTTTCAGCGCTGATGTGTCCGCACCCTTATG	...((((((..(((((((((((((.(((((((((....(.((((....)))).)....))))))))).)))))))))))))..).)))))...	Unigene33450_All:219:311:+	-7.00708	4.29863e-06
Pla-mir89-3p	TGCAGGGGACAGGTTAGGCGC	21	-87.4	794	498	CACTAACCTGCCCCCTGCATG	CCTCCTAAAGTGCCACTAACCTGCCCCCTGCATGCAGGGTGGGGCGCATCACTTCAAAAAGTTATTTACACTTTTTGGGGGTGTAAATCACTTCTTGATGTGATATGTGTCCCTGCATGCAGGGGACAGGTTAGGCGCACTTTAGAAG	.((.(((((((((..((((((((.(((((((((((((((....(((.(((((.((((.((((.(((((((((((...))))))))))).)))).)))).))))).)))..))))))))))))))).))))))))..))))))))).))	Unigene33815_All:178:325:-	-0.654797	8.83119e-16
Pla-mir9	GGAGTGGGTAGGGCGGAAAGG	21	-65.7	2891	3286	TTTCCTGTCCCGCCCATTCCAA	CTGAGCTTTGGGAAGCTTTTGGAGTGGGTAGGGCGGAAAGGTTTTTTTGTCTCCCAATTTCTTTGGGGAAAAATTCTCCTTTCCTGTCCCGCCCATTCCAATGGTTTCCCATCGTTCCTCC	..((((..(((((((((.(((((((((((.(((((((((((....(((.((.(((((.....))))))).)))....))))))).)))).))))))))))).)))))))))..))))....	CL13603.Contig1_All:66:186:+	0.202959	3.3404e-08
Pla-mir90	GTGCAGTCCTCCTTTGGCAGA	21	-48.6	855	0	-	GGGAATAACAGTGCAGTCCTCCTTTGGCAGAGAGGCCGTGCACATTTACTGCAGGACTGTTTGCCAAAGGAGAATTGCCCTGCTATTCTCC	(((((((.(((.(((((.(((((((((((((.((.((.((((.......)))))).)).))))))))))))).))))).))).))))))).	Unigene3516_All:548:638:-	-12.5769	9.04127e-256
Pla-mir91	TCTGACGCTGATGTGGCCGCC	21	-47.2	81	142	TGGAAACATCAGTGCCGAAAG	TTGGGTCAAACGGGTGGAAACATCAGTGCCGAAAGTGATTCACTTTTTGGGGCGTGTGTACATCACTTCTGACGCTGATGTGGCCGCCCCTTGACCTA	.((((((((..((((((..(((((((((.((.(((((((.(((............)))...))))))).)).)))))))))..)))))).))))))))	Unigene35907_All:86:183:+	0.828081	2.74119e-05
Pla-mir92	GGGCATTACCTTCTTTGGCAGT	22	-48.7	22	0	-	CTGCATTACAGGGCATTACCTTCTTTGGCAGTCGGCCACTCAACCTCACGTGCCTCAGCTACGTGTTCTCGCAGTGTGCCTACTGCCAAAGGAGATTTGCCCGGCAATTCTT	..........(((((....(((((((((((((.((((((((.....(((((((....)).))))).....).)))).))).)))))))))))))...)))))..........	Unigene44096_All:6:117:+	-7.29655	2.75505e-07
Pla-mir93	ACTCTCCCCAAAGGGCTTCAA	21	-43.6	73	67	-	CTAAGCATTTACTCTCCCCAAAGGGCTTCAATCCCCCACCACCTTGGGTCGAGGTTGAAGCCCTTCCGGGGGAGTCGATGAGAGC	.....((((.((((((((..((((((((((((((((((......))))..).)))))))))))))..)))))))).)))).....	Unigene46295_All:56:140:-	-0.105542	0.667147
Pla-mir95	TCAGGGGTGGATACATCAGCG	21	-41.8	15	37	-	TAAAATGGAATCAGGGGTGGATACATCAGCGTTAAAAATTGATAAGCACCCCTGAAAAAGTGAAAGTCATTTTTTGGCCCTGATGTGTCAGCTCCGTGATGTCATTCTA	...(((((.(((((((((.((((((((((.((((((((.((((...(((..........)))...)))).)))))))).)))))))))).))))).)))).)))))...	Unigene46691_All:370:478:+	1.32077	0.00187977
Pla-mir97	AGGGCTCCTCCCTCTTGGCAGGT	23	-46	35	0	-	AACCAGTCGTAGGGCTCCTCCCTCTTGGCAGGTAATGGTGAGAGATGATGTTTATCTTTATTTGCACCCAATGGCCCGCCAAAGGAGAGTTGCCCTCTGACTGTTT	...((((((.(((((..((((((.(((((.(((...((((((((((((...)))))))).....)))).....))).)))))))).)))..))))).))))))...	Unigene48567_All:57:162:+	-7.96642	3.64947e-11
Pla-mir98	TTGGAATCCTCCTCCCGTCGC	21	-60.8	58	71	-	TGCGACTCGAGGAGGAATCCAAAGGGATCGCATTGATCCCAAACTATCCTTGAAAAAATGTTCAGGTATTGTTGAATTTGGATCATGCCATCCCTTTGGAATCCTCCTCCCGTCGCTTCCAACTCG	.(((((..((((((((.(((((((((((.((((.(((((..(((.((.((((((......)))))).)).)))......))))))))).))))))))))).))))))))..)))))..........	Unigene50185_All:1:126:+	0.309967	0.225371
Pla-mir99	TGCTAGAGGCATAGTCTTTGG	21	-125	12658	13813	AAAGACTATGGCTCTATCAAA	AGGCAGTATTTGCTAGAGGCATAGTCTTTGGAGAAGAAAGACATCCGGATTTTCAACTGTTCAACAGCCGCGAGATGAAATATTATGCACTTCATGGAGCAACATGCCCACCCCTCTTCTTGTTCTTCATGGACAACGATGTGTTTTTAAGCAATTTTTCATCTCACGCCGGATTAGGCTGCTGCTGGGGCAATCAACGCTTCCGTCCATCCAACATATCCGGCCGGAGATTGGTCTTTTCAATACATCAAGACGGCAGAACGTTGGTTGAACAGATCAAATTCTCGATGCTTTCTTCTCCAAAGACTATGGCTCTATCAAATACTTCCC	.((.((((((((.(((((.(((((((((((((((((((((.((((.(((.(((...(((((((((....(((.((((...)))).)))..(((((((((.((((................)))))))))))))....((((((((...((((........(((((..(((((((..((.((..((.(((((.......))))).)).)).)).....)))))))..)))))..).)))...))))))))..((((......)))).)))))))))...))).))).))))))))))))))))))))))))).))))).)))))))).)).	Unigene5279_All:316:645:-	0.144172	4.44349e-16

## Sheet: Table S3
Table S3. Identified targets of miRNAs involved in P. acerifolia by degradome analysis.
miRNA	mRNA	cleave_site	score	XLM-0B-categoty	XLM-0B-pval	XLM-0B-rawtags	XLM-0B-normtags	XLM-12-40B-categoty	XLM-12-40B-pval	XLM-12-40B-rawtags	XLM-12-40B-normtags	Nr-annotation	ko-definition	biological-process	cellular-component	molecular-function
Pla-miR159a/b-3p	CL13287.Contig1_All	790	1.5	0	0	80	40	0	0	145	72.5	hypothetical protein PRUPE_ppa003628mg [Prunus persica] >gi|462415424|gb|EMJ20161.1| hypothetical protein PRUPE_ppa003628mg [Prunus persica]	myb proto-oncogene protein, plant	biological regulation;cellular process;positive regulation of biological process;regulation of biological process;response to stimulus;single-organism process	--	binding
	CL13287.Contig2_All	898	1.5	0	0	80	40	0	0	145	72.5	hypothetical protein PRUPE_ppa003628mg [Prunus persica] >gi|462415424|gb|EMJ20161.1| hypothetical protein PRUPE_ppa003628mg [Prunus persica]	myb proto-oncogene protein, plant	biological regulation;cellular process;positive regulation of biological process;regulation of biological process;response to stimulus;single-organism process	--	binding
	CL338.Contig2_All	812	2.5	0	0.002	13	13	0	0.002	10	10	Actin cytoskeleton-regulatory complex protein pan1, putative isoform 1 [Theobroma cacao] >gi|508721278|gb|EOY13175.1| Actin cytoskeleton-regulatory complex protein pan1, putative isoform 1 [Theobroma cacao]	--	--	--	--
	CL338.Contig3_All	13	2.5	1	0.002	18	9	1	0.004	2	1	--	--	--	--	--
	Unigene26765_All	505	4	--	--	--	--	0	0.002	13	6.5	PREDICTED: probable chitinase 3-like [Vitis vinifera]	chitinase [EC:3.2.1.14]	--	--	--
Pla-miR168b	CL894.Contig1_All	499	3	0	0.002	158	79	0	0	189	94.5	eukaryotic translation initiation factor 2c, putative [Ricinus communis] >gi|223534406|gb|EEF36112.1| eukaryotic translation initiation factor 2c, putative [Ricinus communis]	argonaute	cellular process;metabolic process;single-organism process	--	binding
	CL894.Contig2_All	575	2	0	0.002	158	79	0	0	189	94.5	hypothetical protein POPTR_0012s03410g [Populus trichocarpa] >gi|222859011|gb|EEE96558.1| hypothetical protein POPTR_0012s03410g [Populus trichocarpa]	argonaute	--	--	--
Pla-miR3633-3p	Unigene15272_All	197	1.5	0	0	184	184	0	0	136	136	Aspartic proteinase-like protein 1 [Morus notabilis]	--	--	--	--
	Unigene34503_All	237	4.5	4	>0.05	1	1	0	0.008	37	37	hypothetical protein PRUPE_ppa001346mg [Prunus persica] >gi|462398844|gb|EMJ04512.1| hypothetical protein PRUPE_ppa001346mg [Prunus persica]	disease resistance protein RPM1	--	--	--
Pla-miR398a/b-3p	CL15490.Contig1_All	64	4	0	0.024	128	64	0	0.016	66	33	hypothetical protein PRUPE_ppa006317mg [Prunus persica] >gi|462395330|gb|EMJ01129.1| hypothetical protein PRUPE_ppa006317mg [Prunus persica]	S-(hydroxymethyl)glutathione dehydrogenase / alcohol dehydrogenase [EC:1.1.1.284 1.1.1.1]	biological regulation;cellular process;developmental process;establishment of localization;localization;metabolic process;multicellular organismal process;regulation of biological process;reproduction;reproductive process;response to stimulus;single-organism process	cell;cell part;organelle	binding;catalytic activity
	CL15490.Contig2_All	64	4	0	0.024	128	64	2	>0.05	66	33	alcohol dehydrogenase 2 [Diospyros kaki]	S-(hydroxymethyl)glutathione dehydrogenase / alcohol dehydrogenase [EC:1.1.1.284 1.1.1.1]	biological regulation;cellular process;developmental process;establishment of localization;localization;metabolic process;multicellular organismal process;regulation of biological process;reproduction;reproductive process;response to stimulus;single-organism process	cell;cell part;organelle	binding;catalytic activity
	CL15563.Contig1_All	397	2.5	0	0.024	53	26.5	0	0.016	25	12.5	hypothetical protein AMTR_s00088p00121090 [Amborella trichopoda] >gi|548839279|gb|ERM99572.1| hypothetical protein AMTR_s00088p00121090 [Amborella trichopoda]	cysteine and glycine-rich protein	--	--	binding
	CL15563.Contig2_All	397	2.5	0	0.024	53	26.5	0	0.016	25	12.5	hypothetical protein AMTR_s00088p00121090 [Amborella trichopoda] >gi|548839279|gb|ERM99572.1| hypothetical protein AMTR_s00088p00121090 [Amborella trichopoda]	cysteine and glycine-rich protein	--	--	binding
	CL16151.Contig1_All	1805	4	0	0.024	53	26.5	0	0.016	109	54.5	unnamed protein product [Vitis vinifera]	ribonuclease P/MRP protein subunit RPP1 [EC:3.1.26.5]	cellular process;developmental process;metabolic process;multi-organism process;multicellular organismal process;reproduction;reproductive process;single-organism process	cell;cell part;organelle	catalytic activity
	CL16151.Contig2_All	1859	4	0	0.024	53	26.5	0	0.016	109	54.5	unnamed protein product [Vitis vinifera]	ribonuclease P/MRP protein subunit RPP1 [EC:3.1.26.5]	cellular process;developmental process;metabolic process;multi-organism process;multicellular organismal process;reproduction;reproductive process;single-organism process	cell;cell part;organelle	catalytic activity
	Unigene8127_All	397	3	0	0.024	228	228	0	0.016	31	31	conserved hypothetical protein [Ricinus communis] >gi|223535122|gb|EEF36802.1| conserved hypothetical protein [Ricinus communis]	--	--	--	--
Pla-miR399a/e-3p	CL6054.Contig5_All	287	1.5	0	0	15	11	0	0	7	7	PREDICTED: probable ubiquitin-conjugating enzyme E2 24-like [Vitis vinifera] >gi|297735992|emb|CBI23966.3| unnamed protein product [Vitis vinifera]	ubiquitin-conjugating enzyme E2 O [EC:6.3.2.19]	--	--	catalytic activity
Pla-miR399a-3p	Unigene66645_All	634	2	0	0	5	5	0	0	6	6	--	--	--	--	--
Pla-miR482a-3p	CL14489.Contig2_All	1168	3.5	0	0.002	54	54	0	0.004	31	31	Kinase family protein [Theobroma cacao] >gi|508720931|gb|EOY12828.1| Kinase family protein [Theobroma cacao]	interleukin-1 receptor-associated kinase 4 [EC:2.7.11.1]	biological regulation;cellular component organization or biogenesis;cellular process;developmental process;growth;metabolic process;multicellular organismal process;regulation of biological process;response to stimulus;signaling;single-organism process	cell;cell part;membrane	binding;catalytic activity
	CL6777.Contig1_All	120	4.5	0	0.002	8	4	0	0.004	7	3.5	5-enolpyruvylshikimate 3-phosphate synthase [Camptotheca acuminata]	3-phosphoshikimate 1-carboxyvinyltransferase [EC:2.5.1.19]	cellular process;metabolic process	--	catalytic activity
	Unigene21555_All	37	3.5	0	0.002	14	14	0	0.004	42	42	PREDICTED: disease resistance protein RPM1-like isoform X1 [Glycine max] >gi|571473843|ref|XP_006586050.1| PREDICTED: disease resistance protein RPM1-like isoform X2 [Glycine max] >gi|571473845|ref|XP_006586051.1| PREDICTED: disease resistance protein RPM1-like isoform X3 [Glycine max]	disease resistance protein RPM1	--	--	--
	Unigene34503_All	237	4.5	4	>0.05	1	1	0	0.004	37	37	hypothetical protein PRUPE_ppa001346mg [Prunus persica] >gi|462398844|gb|EMJ04512.1| hypothetical protein PRUPE_ppa001346mg [Prunus persica]	disease resistance protein RPM1	--	--	--
	Unigene6816_All	567	3.5	0	0.002	176	176	0	0.004	20	20	NBS-containing resistance-like protein [Platanus x acerifolia]	--	--	--	--
Pla-miR828a/b/c	CL17417.Contig1_All	417	2	0	0	9	9	--	--	--	--
	Unigene9914_All	82	0	0	0	1972	1972	0	0	453	453	hypothetical protein PRUPE_ppa016135mg, partial [Prunus persica] >gi|462405741|gb|EMJ11205.1| hypothetical protein PRUPE_ppa016135mg, partial [Prunus persica]	myb proto-oncogene protein, plant	--	--	binding
Pla-M103-3p	CL16107.Contig1_All	61	3.5	--	--	--	--	1	0.026	2	2	--	--	--	--	--
Pla-M108-3p	CL2694.Contig1_All	1371	4.5	2	>0.05	18	9	2	0.002	24	12	PREDICTED: beta-amylase 1, chloroplastic-like [Cucumis sativus]	beta-amylase [EC:3.2.1.2]	metabolic process	--	catalytic activity
	CL2694.Contig2_All	1409	4.5	2	>0.05	18	9	2	0.002	24	12	hypothetical protein EUGRSUZ_H02879 [Eucalyptus grandis]	beta-amylase [EC:3.2.1.2]	metabolic process	--	catalytic activity
	CL4110.Contig2_All	726	4.5	--	--	--	--	2	0.002	3	3	hypothetical protein PRUPE_ppa007906mg [Prunus persica] >gi|595825772|ref|XP_007205461.1| hypothetical protein PRUPE_ppa007906mg [Prunus persica] >gi|462401102|gb|EMJ06659.1| hypothetical protein PRUPE_ppa007906mg [Prunus persica] >gi|462401103|gb|EMJ06660.1| hypothetical protein PRUPE_ppa007906mg [Prunus persica]	reversibly glycosylated polypeptide / UDP-arabinopyranose mutase [EC:2.4.1.- 5.4.99.30]	cellular process;metabolic process;response to stimulus	--	catalytic activity
	CL470.Contig1_All	631	4	3	>0.05	15	7.5	2	0.002	27	13.5	1-aminocyclopropane-1-carboxylate oxidase [Morus alba]	aminocyclopropanecarboxylate oxidase [EC:1.14.17.4]	cellular process;metabolic process;multi-organism process;response to stimulus	cell;cell part;membrane	binding;catalytic activity
	CL470.Contig2_All	631	4	2	>0.05	15	7.5	2	0.002	27	13.5	1-aminocyclopropane-1-carboxylate oxidase 3 [Morus notabilis]	aminocyclopropanecarboxylate oxidase [EC:1.14.17.4]	cellular process;metabolic process;multi-organism process;response to stimulus	cell;cell part;membrane	binding;catalytic activity
	CL4834.Contig1_All	327	4.5	3	>0.05	2	1	2	0.002	9	4.5	cytochrome b-c1 complex subunit 8 [Jatropha curcas]	--	--	cell;cell part;macromolecular complex;membrane;membrane part;organelle;organelle part	catalytic activity;transporter activity
	CL4834.Contig3_All	327	4.5	3	>0.05	2	1	2	0.002	9	4.5	cytochrome b-c1 complex subunit 8 [Jatropha curcas]	--	--	cell;cell part;macromolecular complex;membrane;membrane part;organelle;organelle part	catalytic activity;transporter activity
	CL603.Contig2_All	577	4.5	--	--	--	--	2	0.002	2	2	ripening-related P-450 enzyme-like [Vitis vinifera]	[EC:1.14.-.-]	--	--	binding;catalytic activity
	CL6783.Contig2_All	12	4.5	2	>0.05	2	0.666667	2	0.002	3	1	PREDICTED: diaminopimelate decarboxylase 2, chloroplastic isoform 1 [Vitis vinifera]	diaminopimelate decarboxylase [EC:4.1.1.20]	cellular process;metabolic process	cell;cell part;organelle;organelle part	catalytic activity
	CL6783.Contig3_All	12	4.5	3	>0.05	2	0.666667	2	0.002	3	1	hypothetical protein PRUPE_ppa004857mg [Prunus persica] >gi|462395207|gb|EMJ01006.1| hypothetical protein PRUPE_ppa004857mg [Prunus persica]	diaminopimelate decarboxylase [EC:4.1.1.20]	cellular process;metabolic process	cell;cell part;organelle;organelle part	catalytic activity
	CL88.Contig3_All	36	4	--	--	--	--	2	0.002	43	21.5	PREDICTED: extensin-2-like [Solanum tuberosum]	phospholipase D [EC:3.1.4.4]	--	--	--
	CL910.Contig1_All	1627	4.5	2	>0.05	7	1.16667	2	0.002	2	0.333333	PREDICTED: protein LHY-like [Vitis vinifera]	circadian clock associated 1	--	--	--
	CL910.Contig2_All	1627	4.5	2	>0.05	7	1.16667	2	0.002	2	0.333333	PREDICTED: protein LHY-like [Vitis vinifera]	circadian clock associated 1	--	--	--
	CL910.Contig3_All	1640	4.5	2	>0.05	7	1.16667	2	0.002	2	0.333333	PREDICTED: protein LHY-like [Vitis vinifera]	LATE ELONGATED HYPOCOTYL	--	--	--
	Unigene14843_All	1381	4.5	2	>0.05	7	1.16667	2	0.002	2	0.333333	PREDICTED: protein LHY-like [Vitis vinifera]	circadian clock associated 1	--	--	--
	Unigene14844_All	1235	4.5	2	>0.05	7	1.16667	2	0.002	2	0.333333	PREDICTED: protein LHY-like [Vitis vinifera]	LATE ELONGATED HYPOCOTYL	--	--	--
	Unigene18740_All	251	4.5	--	--	--	--	2	0.002	3	3	PREDICTED: glutathione S-transferase F13 [Vitis vinifera] >gi|296086588|emb|CBI32223.3| unnamed protein product [Vitis vinifera]	glutathione S-transferase [EC:2.5.1.18]	--	--	catalytic activity
	Unigene33323_All	24	4	--	--	--	--	2	0.002	43	21.5	PREDICTED: uncharacterized protein LOC102596521 isoform X4 [Solanum tuberosum]	phospholipase D [EC:3.1.4.4]	--	--	--
Pla-M109-3p	CL17365.Contig1_All	228	1	4	0	1	0.5	--	--	--	--
	Unigene58065_All	159	1	0	0	16	4.25	2	>0.05	7	1.75	--	--	--	--	--
Pla-M161	Unigene66645_All	634	3	0	0.002	5	5	0	0	6	6	--	--	--	--	--
Pla-M25a/b	CL391.Contig2_All	391	2.5	4	0.036	1	0.5	--	--	--	--	--	--	--	--	--
	CL391.Contig3_All	261	2.5	4	0.036	1	0.5	--	--	--	--	--	--	--	--	--
	CL5945.Contig1_All	94	4.5	4	0.036	1	0.5	--	--	--	--	Lipoic acid synthase 1 isoform 3 [Theobroma cacao] >gi|508707459|gb|EOX99355.1| Lipoic acid synthase 1 isoform 3 [Theobroma cacao]	lipoic acid synthetase [EC:2.8.1.8]	cellular process;metabolic process	cell;cell part;organelle	binding;catalytic activity
	CL5945.Contig2_All	94	4.5	4	0.036	1	0.5	--	--	--	--	RecName: Full=Lipoyl synthase, mitochondrial; AltName: Full=Lipoate synthase; Short=LS; Short=Lip-syn; AltName: Full=Lipoic acid synthase; Flags: Precursor [Ricinus communis]	lipoic acid synthetase [EC:2.8.1.8]	--	--	binding;catalytic activity
	Unigene23894_All	439	4	4	0.036	1	1	--	--	--	--
Pla-M29-3p	CL17790.Contig14_All	1117	2	4	0.002	1	1	--	--	--	--
	CL1864.Contig1_All	2215	4	4	0.002	1	1	4	>0.05	1	1	sucrose synthase 1 [Betula luminifera]	sucrose synthase [EC:2.4.1.13]	cellular process;metabolic process	--	catalytic activity
	Unigene25825_All	561	4.5	4	0.002	1	1	--	--	--	--	PREDICTED: mannose-P-dolichol utilization defect 1 protein homolog [Vitis vinifera] >gi|302142273|emb|CBI19476.3| unnamed protein product [Vitis vinifera]	mannose-P-dolichol utilization defect 1	--	--	--
Pla-M3	CL11307.Contig2_All	1008	0	2	0	3	3	2	0	4	2.5	hypothetical protein EUGRSUZ_I01764 [Eucalyptus grandis]	glutaredoxin 3	biological regulation;cellular process;metabolic process;regulation of biological process;single-organism process	cell;cell part;membrane;organelle	catalytic activity;electron carrier activity
	Unigene20690_All	322	1.5	2	0	3	3	0	0	17	17	PREDICTED: SPX domain-containing protein 3-like [Vitis vinifera] >gi|296089210|emb|CBI38913.3| unnamed protein product [Vitis vinifera]	--	--	--	--
Pla-M30a/b/c/d/e	CL13490.Contig1_All	974	2	--	--	--	--	4	0.018	1	0.333333	Protein-tyrosine phosphatase mitochondrial 1-like protein [Morus notabilis]	dual specificity phosphatase [EC:3.1.3.16 3.1.3.48]	cellular process;metabolic process	--	catalytic activity
	CL13490.Contig2_All	878	2	--	--	--	--	4	0.018	1	0.333333	Protein-tyrosine phosphatase mitochondrial 1-like protein [Morus notabilis]	dual specificity phosphatase [EC:3.1.3.16 3.1.3.48]	cellular process;metabolic process	--	catalytic activity
	CL13490.Contig5_All	645	2	--	--	--	--	4	0.018	1	0.333333	Protein-tyrosine phosphatase mitochondrial 1-like protein [Morus notabilis]	dual specificity phosphatase [EC:3.1.3.16 3.1.3.48]	cellular process;metabolic process	--	catalytic activity
	CL15073.Contig1_All	1186	4	--	--	--	--	4	0.018	1	1	unnamed protein product [Vitis vinifera]	transcription initiation factor TFIIH subunit 4	--	cell;cell part;membrane	--
	CL264.Contig1_All	2048	0	3	0	6	1	3	0	6	1	Receptor lectin kinase [Theobroma cacao] >gi|508715558|gb|EOY07455.1| Receptor lectin kinase [Theobroma cacao]	argininosuccinate synthase [EC:6.3.4.5]	cellular process;metabolic process	--	binding;catalytic activity
	CL264.Contig4_All	2189	0	3	0	6	1	3	0	6	1	Receptor lectin kinase [Theobroma cacao] >gi|508715558|gb|EOY07455.1| Receptor lectin kinase [Theobroma cacao]	argininosuccinate synthase [EC:6.3.4.5]	cellular process;metabolic process	--	binding;catalytic activity
	CL37.Contig1_All	97	4.5	--	--	--	--	4	0.018	1	1	hypothetical protein POPTR_0002s25720g [Populus trichocarpa] >gi|222843569|gb|EEE81116.1| hypothetical protein POPTR_0002s25720g [Populus trichocarpa]	NADH dehydrogenase (ubiquinone) 1 alpha subcomplex 9 [EC:1.6.5.3 1.6.99.3]	response to stimulus	cell;cell part;macromolecular complex;membrane;membrane part;organelle	binding
	CL4526.Contig1_All	1410	4.5	--	--	--	--	4	0.018	1	1	PREDICTED: broad-specificity phosphatase YOR283W-like isoform X1 [Solanum tuberosum] >gi|565388940|ref|XP_006360224.1| PREDICTED: broad-specificity phosphatase YOR283W-like isoform X2 [Solanum tuberosum] >gi|565388942|ref|XP_006360225.1| PREDICTED: broad-specificity phosphatase YOR283W-like isoform X3 [Solanum tuberosum] >gi|565388944|ref|XP_006360226.1| PREDICTED: broad-specificity phosphatase Y…	probable phosphoglycerate mutase [EC:5.4.2.1]	metabolic process	--	catalytic activity
	CL4574.Contig1_All	39	4.5	--	--	--	--	4	0.018	1	1	PREDICTED: GATA transcription factor 24-like [Vitis vinifera]	--	--	--	--
	CL5314.Contig2_All	50	4.5	--	--	--	--	4	0.018	1	1	hypothetical protein CICLE_v10020022mg [Citrus clementina] >gi|568852227|ref|XP_006479781.1| PREDICTED: uncharacterized protein LOC102630764 [Citrus sinensis] >gi|557546411|gb|ESR57389.1| hypothetical protein CICLE_v10020022mg [Citrus clementina]	--	--	--	--
	Unigene23862_All	496	4.5	--	--	--	--	4	0.018	1	1	PREDICTED: membrane-anchored ubiquitin-fold protein 4 [Vitis vinifera] >gi|296082312|emb|CBI21317.3| unnamed protein product [Vitis vinifera]	--	--	--	--
Pla-M39	CL4132.Contig2_All	889	3	0	0.002	50	50	0	0.002	24	24	PREDICTED: zinc finger protein CONSTANS-LIKE 16 [Vitis vinifera] >gi|297737819|emb|CBI27020.3| unnamed protein product [Vitis vinifera]	zinc finger protein CONSTANS	--	--	--
	Unigene24059_All	298	3	--	--	--	--	0	0.002	3	3	NB-ARC domain-containing disease resistance protein, putative [Theobroma cacao] >gi|508779760|gb|EOY27016.1| NB-ARC domain-containing disease resistance protein, putative [Theobroma cacao]	DNA-directed RNA polymerases I, II, and III subunit RPABC1	--	--	--
	Unigene27242_All	704	2	--	--	--	--	0	0.002	10	10	Disease resistance protein RPH8A, putative [Theobroma cacao] >gi|508699070|gb|EOX90966.1| Disease resistance protein RPH8A, putative [Theobroma cacao]	disease resistance protein RPM1	--	--	--
	Unigene64263_All	398	3.5	--	--	--	--	2	0.028	2	2	PREDICTED: probable disease resistance RPP8-like protein 4-like [Vitis vinifera]	disease resistance protein RPM1	--	--	--
Pla-M4a/b	CL11352.Contig1_All	313	0	4	0	1	0.5	--	--	--	--
	CL11352.Contig2_All	232	0	4	0	1	0.5	--	--	--	--
Pla-M40a/b	CL2231.Contig2_All	2500	0	--	--	--	--	4	0	1	1	PREDICTED: LOW QUALITY PROTEIN: cytochrome P450 71A4-like [Vitis vinifera]	[EC:1.14.-.-]	--	--	binding;catalytic activity
	Unigene66623_All	201	0.5	--	--	--	--	4	0	1	1	--	--	--	--	--
Pla-M42	CL15541.Contig2_All	1402	2.5	2	0.004	2	2	--	--	--	--
	CL2247.Contig3_All	673	4.5	2	0.004	3	3	4	>0.05	1	1	unnamed protein product [Vitis vinifera]	FUS-interacting serine-arginine-rich protein 1	--	--	binding
	Unigene8797_All	56	2	2	0.004	2	2	--	--	--	--
Pla-M45-3p	CL8373.Contig1_All	876	3.5	--	--	--	--	3	0.044	2	2	PREDICTED: serine hydroxymethyltransferase, mitochondrial-like [Vitis vinifera] >gi|297736687|emb|CBI25704.3| unnamed protein product [Vitis vinifera]	glycine hydroxymethyltransferase [EC:2.1.2.1]	cellular process;metabolic process	cell;cell part;organelle	binding;catalytic activity
	Unigene18740_All	864	4.5	--	--	--	--	3	0.044	2	2	PREDICTED: glutathione S-transferase F13 [Vitis vinifera] >gi|296086588|emb|CBI32223.3| unnamed protein product [Vitis vinifera]	glutathione S-transferase [EC:2.5.1.18]	--	--	catalytic activity
Pla-M46	CL282.Contig2_All	462	3	2	>0.05	4	1.33333	3	0.014	2	0.666667	PREDICTED: PRA1 family protein B4-like [Vitis vinifera]	RNA-binding protein 39	establishment of localization;localization	cell;cell part;organelle	--
	CL282.Contig3_All	442	3	2	>0.05	4	1.33333	3	0.014	2	0.666667	PREDICTED: PRA1 family protein B4-like [Vitis vinifera]	RNA-binding protein 39	establishment of localization;localization	cell;cell part;organelle	--
	CL282.Contig4_All	451	3	2	>0.05	4	1.33333	3	0.014	2	0.666667	PREDICTED: PRA1 family protein B4-like [Vitis vinifera]	RNA-binding protein 39	establishment of localization;localization	cell;cell part;organelle	--
Pla-M57a/b-3p	CL12482.Contig1_All	532	2	--	--	--	--	4	0	1	0.5	--	--	--	--	--
Pla-M58	Unigene10401_All	356	1	4	>0.05	1	1	1	0	2	2	--	--	--	--	--
Pla-M59	CL15929.Contig2_All	1214	2	--	--	--	--	2	0.004	8	4	unnamed protein product [Vitis vinifera]	6'-deoxychalcone synthase [EC:2.3.1.170]	cellular process;metabolic process	--	--
	CL15929.Contig3_All	470	2	--	--	--	--	2	0.004	8	4	hypothetical protein EUGRSUZ_B026411, partial [Eucalyptus grandis]	aldehyde reductase [EC:1.1.1.21]	--	--	catalytic activity
	CL731.Contig4_All	335	4	2	>0.05	16	8	2	0.004	34	17	hypothetical protein EUGRSUZ_B02456 [Eucalyptus grandis] >gi|629121184|gb|KCW85674.1| hypothetical protein EUGRSUZ_B02456 [Eucalyptus grandis]	L-ascorbate peroxidase [EC:1.11.1.11]	metabolic process;response to stimulus	--	antioxidant activity;binding;catalytic activity
	Unigene58929_All	338	4	2	>0.05	16	8	2	0.004	34	17	PREDICTED: L-ascorbate peroxidase 2, cytosolic-like [Solanum lycopersicum]	L-ascorbate peroxidase [EC:1.11.1.11]	metabolic process;response to stimulus	--	antioxidant activity;binding;catalytic activity
Pla-M6a/b/c/d-3p	CL5730.Contig4_All	389	4	4	>0.05	1	1	0	0.048	12	12	PREDICTED: probable iron/ascorbate oxidoreductase DDB_G0283291-like isoform 1 [Vitis vinifera]		metabolic process	--	binding;catalytic activity
Pla-M65-3p	Unigene5776_All	251	1.5	0	0	5	4.33333	--	--	--	--
Pla-M67a/b-3p	CL11256.Contig2_All	1217	2	--	--	--	--	2	0.004	2	0.666667	R2R3 MYB transcription factor splice variant 1 [Vitis vinifera]	myb proto-oncogene protein, plant	--	--	--
	CL5623.Contig1_All	220	0.5	--	--	--	--	2	0.004	2	0.666667	--	--	--	--	--
	CL6394.Contig2_All	1854	1.5	--	--	--	--	3	0	2	0.666667	PREDICTED: UDP-glycosyltransferase 85A2-like [Vitis vinifera]	cyanohydrin beta-glucosyltransferase [EC:2.4.1.85]	metabolic process	--	catalytic activity
	CL6660.Contig5_All	86	4.5	2	>0.05	5	5	2	0.004	2	2	unnamed protein product [Vitis vinifera]	homeobox-leucine zipper protein	biological regulation;cellular process;developmental process;metabolic process;multicellular organismal process;negative regulation of biological process;regulation of biological process;single-organism process	cell;cell part;organelle	binding;nucleic acid binding transcription factor activity
	Unigene33157_All	234	4	--	--	--	--	2	0.004	3	3	unnamed protein product [Vitis vinifera]	--	--	--	--
	Unigene66751_All	40	3	--	--	--	--	3	0.008	2	0.666667	--	--	--	--	--
Pla-M68-3p	CL12.Contig3_All	1085	1	2	0	11	11	0	0	5	5	PREDICTED: potassium channel AKT1-like [Vitis vinifera]	cyclic nucleotide gated channel, other eukaryote	cellular process;establishment of localization;localization;single-organism process	membrane;membrane part	transporter activity
Pla-M91	CL14766.Contig2_All	832	1	4	>0.05	1	1	4	0	1	1	--	--	--	--	--
Pla-M95	CL17604.Contig1_All	709	1.5	--	--	--	--	4	0.004	1	0.333333	SCL domain class transcription factor [Theobroma cacao] >gi|508699744|gb|EOX91640.1| SCL domain class transcription factor [Theobroma cacao]	DELLA protein	biological regulation;cellular process;metabolic process;regulation of biological process	--	--
	CL17604.Contig2_All	203	1.5	--	--	--	--	4	0.004	1	0.333333	--	--	--	--	--
	Unigene13883_All	186	4.5	4	>0.05	1	1	4	0.004	1	1	PREDICTED: cytochrome c oxidase subunit 5b-1, mitochondrial-like isoform X2 [Citrus sinensis]	cytochrome c oxidase subunit 5b	cellular process;metabolic process	cell;cell part;macromolecular complex;membrane;membrane part;organelle;organelle part	binding;catalytic activity;transporter activity
	Unigene23581_All	667	1.5	--	--	--	--	4	0.004	1	0.333333	PREDICTED: protein arginine N-methyltransferase 1.1-like [Vitis vinifera]	protein arginine N-methyltransferase 1 [EC:2.1.1.-]	biological regulation;cellular component organization or biogenesis;cellular process;developmental process;metabolic process;multicellular organismal process;regulation of biological process;reproduction;reproductive process;single-organism process	cell;cell part;membrane-enclosed lumen;organelle;organelle part	binding;catalytic activity
Pla-M99	Unigene2267_All	397	1	0	0	14	14	0	0	22	22	hypothetical protein EUGRSUZ_C02108 [Eucalyptus grandis]	--	--	--	--

## Sheet: Table S4
Table S4. The targets classified by Kyoto Encyclopedia of Genes and Genomes (KEGG).
Pathway	All genes with pathway annotation (3327)	Pathway ID	Level 1	Level 2
Metabolic pathways	887 (26.66%)	ko01100	Metabolism	Global map
Biosynthesis of secondary metabolites	447 (13.44%)	ko01110	Metabolism	Global map
Plant hormone signal transduction	199 (5.98%)	ko04075	Environmental Information Processing	Signal transduction
Plant-pathogen interaction	177 (5.32%)	ko04626	Organismal Systems	Environmental adaptation
Spliceosome	157 (4.72%)	ko03040	Genetic Information Processing	Transcription
RNA transport	131 (3.94%)	ko03013	Genetic Information Processing	Translation
Endocytosis	121 (3.64%)	ko04144	Cellular Processes	Transport and catabolism
Glycerophospholipid metabolism	109 (3.28%)	ko00564	Metabolism	Lipid metabolism
Ribosome	101 (3.04%)	ko03010	Genetic Information Processing	Translation
Protein processing in endoplasmic reticulum	87 (2.61%)	ko04141	Genetic Information Processing	Folding, sorting and degradation
Starch and sucrose metabolism	86 (2.58%)	ko00500	Metabolism	Carbohydrate metabolism
Ether lipid metabolism	82 (2.46%)	ko00565	Metabolism	Lipid metabolism
Purine metabolism	69 (2.07%)	ko00230	Metabolism	Nucleotide metabolism
mRNA surveillance pathway	69 (2.07%)	ko03015	Genetic Information Processing	Translation
Phenylpropanoid biosynthesis	65 (1.95%)	ko00940	Metabolism	Biosynthesis of other secondary metabolites
Ribosome biogenesis in eukaryotes	61 (1.83%)	ko03008	Genetic Information Processing	Translation
RNA degradation	58 (1.74%)	ko03018	Genetic Information Processing	Folding, sorting and degradation
Glycolysis / Gluconeogenesis	57 (1.71%)	ko00010	Metabolism	Carbohydrate metabolism
Pyrimidine metabolism	57 (1.71%)	ko00240	Metabolism	Nucleotide metabolism
Pyruvate metabolism	55 (1.65%)	ko00520	Metabolism	Carbohydrate metabolism
Pyruvate metabolism	52 (1.56%)	ko00620	Metabolism	Carbohydrate metabolism
Circadian rhythm - plant	51 (1.53%)	ko04712	Organismal Systems	Environmental adaptation
Ubiquitin mediated proteolysis	49 (1.47%)	ko04120	Genetic Information Processing	Folding, sorting and degradation
Flavonoid biosynthesis	44 (1.32%)	ko00941	Metabolism	Biosynthesis of other secondary metabolites
ABC transporters	43 (1.29%)	ko02010	Environmental Information Processing	Membrane transport
Phagosome	42 (1.26%)	ko04145	Cellular Processes	Transport and catabolism
Oxidative phosphorylation	41 (1.23%)	ko00190	Metabolism	Energy metabolism
Phenylalanine metabolism	40 (1.2%)	ko00360	Metabolism	Amino acid metabolism
Carbon fixation in photosynthetic organisms	40 (1.2%)	ko00710	Metabolism	Energy metabolism
Ascorbate and aldarate metabolism	37 (1.11%)	ko00053	Metabolism	Carbohydrate metabolism
Phenylalanine, tyrosine and tryptophan biosynthesis	35 (1.05%)	ko00400	Metabolism	Amino acid metabolism
RNA polymerase	32 (0.96%)	ko03020	Genetic Information Processing	Transcription
Glyoxylate and dicarboxylate metabolism	31 (0.93%)	ko00630	Metabolism	Carbohydrate metabolism
Arginine and proline metabolism	30 (0.9%)	ko00330	Metabolism	Amino acid metabolism
Glycine, serine and threonine metabolism	30 (0.9%)	ko00260	Metabolism	Amino acid metabolism
Glutathione metabolism	29 (0.87%)	ko00480	Metabolism	Metabolism of other amino acids
Tyrosine metabolism	29 (0.87%)	ko00350	Metabolism	Amino acid metabolism
Cysteine and methionine metabolism	28 (0.84%)	ko00270	Metabolism	Amino acid metabolism
Galactose metabolism	28 (0.84%)	ko00052	Metabolism	Carbohydrate metabolism
Pentose and glucuronate interconversions	28 (0.84%)	ko00040	Metabolism	Carbohydrate metabolism
Proteasome	27 (0.81%)	ko03050	Genetic Information Processing	Folding, sorting and degradation
Peroxisome	26 (0.78%)	ko04146	Cellular Processes	Transport and catabolism
Carotenoid biosynthesis	26 (0.78%)	ko00906	Metabolism	Metabolism of terpenoids and polyketides
Alanine, aspartate and glutamate metabolism	26 (0.78%)	ko00250	Metabolism	Amino acid metabolism
Pentose phosphate pathway	25 (0.75%)	ko00030	Metabolism	Carbohydrate metabolism
Basal transcription factors	25 (0.75%)	ko03022	Genetic Information Processing	Transcription
Fructose and mannose metabolism	25 (0.75%)	ko00051	Metabolism	Carbohydrate metabolism
Photosynthesis	24 (0.72%)	ko00195	Metabolism	Energy metabolism
Regulation of autophagy	24 (0.72%)	ko04140	Cellular Processes	Transport and catabolism
Propanoate metabolism	23 (0.69%)	ko00640	Metabolism	Carbohydrate metabolism
alpha-Linolenic acid metabolism	22 (0.66%)	ko00592	Metabolism	Lipid metabolism
Porphyrin and chlorophyll metabolism	21 (0.63%)	ko00860	Metabolism	Metabolism of cofactors and vitamins
Cyanoamino acid metabolism	21 (0.63%)	ko00460	Metabolism	Metabolism of other amino acids
Protein export	20 (0.6%)	ko03060	Genetic Information Processing	Folding, sorting and degradation
Fatty acid biosynthesis	19 (0.57%)	ko00061	Metabolism	Lipid metabolism
N-Glycan biosynthesis	19 (0.57%)	ko00510	Metabolism	Glycan biosynthesis and metabolism
Nitrogen metabolism	19 (0.57%)	ko00910	Metabolism	Energy metabolism
Sphingolipid metabolism	19 (0.57%)	ko00600	Metabolism	Lipid metabolism
Glycerolipid metabolism	19 (0.57%)	ko00561	Metabolism	Lipid metabolism
Phosphatidylinositol signaling system	19 (0.57%)	ko04070	Environmental Information Processing	Signal transduction
Other glycan degradation	18 (0.54%)	ko00511	Metabolism	Glycan biosynthesis and metabolism
Fatty acid elongation	18 (0.54%)	ko00062	Metabolism	Lipid metabolism
Stilbenoid, diarylheptanoid and gingerol biosynthesis	18 (0.54%)	ko00945	Metabolism	Biosynthesis of other secondary metabolites
Nucleotide excision repair	18 (0.54%)	ko03420	Genetic Information Processing	Replication and repair
Citrate cycle (TCA cycle)	18 (0.54%)	ko00020	Metabolism	Carbohydrate metabolism
Glycosylphosphatidylinositol(GPI)-anchor biosynthesis	17 (0.51%)	ko00563	Metabolism	Glycan biosynthesis and metabolism
Terpenoid backbone biosynthesis	17 (0.51%)	ko00900	Metabolism	Metabolism of terpenoids and polyketides
Inositol phosphate metabolism	16 (0.48%)	ko00562	Metabolism	Carbohydrate metabolism
Ubiquinone and other terpenoid-quinone biosynthesis	16 (0.48%)	ko00130	Metabolism	Metabolism of cofactors and vitamins
Limonene and pinene degradation	14 (0.42%)	ko00903	Metabolism	Metabolism of terpenoids and polyketides
Aminoacyl-tRNA biosynthesis	14 (0.42%)	ko00970	Genetic Information Processing	Translation
Isoquinoline alkaloid biosynthesis	14 (0.42%)	ko00950	Metabolism	Biosynthesis of other secondary metabolites
Homologous recombination	13 (0.39%)	ko03440	Genetic Information Processing	Replication and repair
Zeatin biosynthesis	13 (0.39%)	ko00908	Metabolism	Metabolism of terpenoids and polyketides
Fatty acid metabolism	13 (0.39%)	ko00071	Metabolism	Lipid metabolism
Folate biosynthesis	13 (0.39%)	ko00790	Metabolism	Metabolism of cofactors and vitamins
Valine, leucine and isoleucine degradation	13 (0.39%)	ko00280	Metabolism	Amino acid metabolism
Steroid biosynthesis	12 (0.36%)	ko00100	Metabolism	Lipid metabolism
Pantothenate and CoA biosynthesis	11 (0.33%)	ko00770	Metabolism	Metabolism of cofactors and vitamins
Photosynthesis - antenna proteins	11 (0.33%)	ko00196	Metabolism	Energy metabolism
Biosynthesis of unsaturated fatty acids	11 (0.33%)	ko01040	Metabolism	Lipid metabolism
Riboflavin metabolism	11 (0.33%)	ko00740	Metabolism	Metabolism of cofactors and vitamins
One carbon pool by folate	11 (0.33%)	ko00670	Metabolism	Metabolism of cofactors and vitamins
Natural killer cell mediated cytotoxicity	10 (0.3%)	ko04650	Organismal Systems	Immune system
Tropane, piperidine and pyridine alkaloid biosynthesis	10 (0.3%)	ko00960	Metabolism	Biosynthesis of other secondary metabolites
Flavone and flavonol biosynthesis	10 (0.3%)	ko00944	Metabolism	Biosynthesis of other secondary metabolites
DNA replication	10 (0.3%)	ko03030	Genetic Information Processing	Replication and repair
Linoleic acid metabolism	9 (0.27%)	ko00591	Metabolism	Lipid metabolism
Glycosaminoglycan degradation	9 (0.27%)	ko00531	Metabolism	Glycan biosynthesis and metabolism
SNARE interactions in vesicular transport	9 (0.27%)	ko04130	Genetic Information Processing	Folding, sorting and degradation
Base excision repair	9 (0.27%)	ko03410	Genetic Information Processing	Replication and repair
Cutin, suberine and wax biosynthesis	8 (0.24%)	ko00073	Metabolism	Lipid metabolism
Diterpenoid biosynthesis	8 (0.24%)	ko00904	Metabolism	Metabolism of terpenoids and polyketides
beta-Alanine metabolism	8 (0.24%)	ko00410	Metabolism	Metabolism of other amino acids
Mismatch repair	7 (0.21%)	ko03430	Genetic Information Processing	Replication and repair
Butanoate metabolism	7 (0.21%)	ko00650	Metabolism	Carbohydrate metabolism
Brassinosteroid biosynthesis	7 (0.21%)	ko00905	Metabolism	Metabolism of terpenoids and polyketides
Tryptophan metabolism	7 (0.21%)	ko00380	Metabolism	Amino acid metabolism
Lysine biosynthesis	7 (0.21%)	ko00300	Metabolism	Amino acid metabolism
Sulfur metabolism	7 (0.21%)	ko00920	Metabolism	Energy metabolism
Isoflavonoid biosynthesis	6 (0.18%)	ko00943	Metabolism	Biosynthesis of other secondary metabolites
Selenocompound metabolism	6 (0.18%)	ko00450	Metabolism	Metabolism of other amino acids
Lipoic acid metabolism	6 (0.18%)	ko00785	Metabolism	Metabolism of cofactors and vitamins
Benzoxazinoid biosynthesis	6 (0.18%)	ko00402	Metabolism	Biosynthesis of other secondary metabolites
Nicotinate and nicotinamide metabolism	6 (0.18%)	ko00760	Metabolism	Metabolism of cofactors and vitamins
Valine, leucine and isoleucine biosynthesis	6 (0.18%)	ko00290	Metabolism	Amino acid metabolism
Glycosphingolipid biosynthesis - globo series	6 (0.18%)	ko00603	Metabolism	Glycan biosynthesis and metabolism
Glycosphingolipid biosynthesis - ganglio series	5 (0.15%)	ko00604	Metabolism	Glycan biosynthesis and metabolism
Other types of O-glycan biosynthesis	5 (0.15%)	ko00514	Metabolism	Glycan biosynthesis and metabolism
Histidine metabolism	4 (0.12%)	ko00340	Metabolism	Amino acid metabolism
Thiamine metabolism	4 (0.12%)	ko00730	Metabolism	Metabolism of cofactors and vitamins
Sulfur relay system	4 (0.12%)	ko04122	Genetic Information Processing	Folding, sorting and degradation
Vitamin B6 metabolism	4 (0.12%)	ko00750	Metabolism	Metabolism of cofactors and vitamins
Circadian rhythm - mammal	3 (0.09%)	ko04710	Organismal Systems	Environmental adaptation
Sesquiterpenoid and triterpenoid biosynthesis	3 (0.09%)	ko00909	Metabolism	Metabolism of terpenoids and polyketides
Arachidonic acid metabolism	3 (0.09%)	ko00590	Metabolism	Lipid metabolism
Monoterpenoid biosynthesis	3 (0.09%)	ko00902	Metabolism	Metabolism of terpenoids and polyketides
Non-homologous end-joining	3 (0.09%)	ko03450	Genetic Information Processing	Replication and repair
Lysine degradation	2 (0.06%)	ko00310	Metabolism	Amino acid metabolism
Anthocyanin biosynthesis	2 (0.06%)	ko00942	Metabolism	Biosynthesis of other secondary metabolites
Betalain biosynthesis	2 (0.06%)	ko00965	Metabolism	Biosynthesis of other secondary metabolites
Taurine and hypotaurine metabolism	2 (0.06%)	ko00430	Metabolism	Metabolism of other amino acids
Glucosinolate biosynthesis	2 (0.06%)	ko00966	Metabolism	Biosynthesis of other secondary metabolites
C5-Branched dibasic acid metabolism	2 (0.06%)	ko00660	Metabolism	Carbohydrate metabolism
Indole alkaloid biosynthesis	1 (0.03%)	ko00901	Metabolism	Biosynthesis of other secondary metabolites
Biotin metabolism	1 (0.03%)	ko00780	Metabolism	Metabolism of cofactors and vitamins
Caffeine metabolism	1 (0.03%)	ko00232	Metabolism	Biosynthesis of other secondary metabolites

## Sheet: Table S5
Table S5. qRT-PCR validated miRNAs and their primers.
miRNA	sequence(5'-3')
Pla-miR398a-3p-R	TGTGTTCTCAGGTCGCCCCTG
Pla-miR399a-3p-R	TGCCAAAGGAGAGTTGCCCTG
Pla-miR482b-3p-R	CTTTCCTGTCCCGCCCATTCCA
Pla-mir108-3p-R	TCAGGGGGGTGGCGCAGATG
Pla-mir3-R	TGACATCAGGGCCGACACATC
Pla-mir65-R	CATCAGGGGGTGGCGTAGACG
Pla-mir59-R	TGGCTTCAGGAGACGTACACA
Pla-mir95-R	TCAGGGGTGGATACATCAGCG
qRT-PCR validated miRNAs target genes primers.
miRNA target	sequence(5'-3')
Unigene13883_All-R	AACCATCTCATCATCTCACC
Unigene13883_All-F	AGTGTCCCGTGTGTTCTC
CL13287.Contig1_All-R	CTGGATATTGGAGTGAAGG
CL13287.Contig1_All-F	CAGAATGATAGTTGTGAGAAG
Unigene18740_All-R	CAGCCTCTCCTCATACAC
Unigene18740_Allf-F	CAACAGCCTTAGCGAATC
Unigene6816_All-R	TGTCACCGAACGAGTAATC
Unigene6816_All-F	GCCTCACTGTCTTCCATC
Unigene23581_All-R	GATGATGATGATTGAGGATGG
Unigene23581_All-F	ACCTGGAAGATGTGCTAAC
CL11307.Contig2_All-R	TGCCAATCACATCCATCC
CL11307.Contig2_All-F	TCACAATACAGAAGACTCAATAC
CL731.Contig4_All-R	GTCACTTCTACAGCAACAACTCC
CL731.Contig4_All-F	GCGGCGAACAACGGTCTC
CL6054.Contig5_All-R	AACATACACCAATTCTGCTTCC
CL6054.Contig5_All-F	TCTTACCCATTTCTCCAAACTTAC
